# 1 Effect of park use and landscape structure on COVID-19 2 transmission rates

3 Thomas F. Johnson<sup>1</sup>, Lisbeth A. Hordley<sup>1</sup>, Matthew P. Greenwell<sup>1</sup>, Luke C. Evans<sup>1</sup>

4 1: Ecology and Evolutionary Biology, School of Biological Sciences, University of Reading, Reading, UK

5 Corresponding author: Thomas Frederick Johnson ([Thomas.frederick.johnson@outlook.com](mailto:Thomas.frederick.johnson@outlook.com))

## 6 Abstract

7 The COVID-19 pandemic has had severe impacts on global public health. In England, social  
8 distancing measures and a nationwide lockdown were introduced to reduce the spread of the virus.  
9 Green space accessibility may have been particularly important during this lockdown, as it could  
10 have provided benefits for physical and mental wellbeing. However, the effects of public green  
11 space use on the rate of COVID-19 transmission are yet to be quantified, and as the size and  
12 accessibility of green spaces vary within England's local authorities, the risks and benefits to the  
13 public of using green space may be context-dependent. To evaluate how green space affected  
14 COVID-19 transmission across 299 local authorities (small regions) in England, we calculated a  
15 daily case rate metric, based upon a seven-day moving average, for each day within the period 1<sup>st</sup>  
16 June - 30<sup>th</sup> November 2020 and assessed how baseline health and mobility variables influenced  
17 these rates. Next, looking at the residual case rates, we investigated how landscape structure (e.g.  
18 area and patchiness of green space) and park use influenced transmission. We first show that  
19 reducing mobility is associated with a decline in case rates, especially in areas with high population  
20 clustering. After accounting for known mechanisms behind transmission rates, we found that park  
21 use (showing a preference for park mobility) was associated with decreased residual case rates,  
22 especially when green space was low and contiguous (not patchy). Our results suggest that a  
23 reduction in overall mobility may be a good strategy for reducing case rates, endorsing the success  
24 of lockdown measures. However, if mobility is necessary, outdoor park use may be safer than other  
25 forms of mobility and associated activities (e.g. shopping or office-based working).

26

## 27 **Keywords**

28 COVID; coronavirus; ecosystem services; fragmentation; green space; health; park use; public  
29 health

### 30 **1. Introduction**

31 The COVID-19 pandemic has had severe impacts on public health (Mahase, 2020) and remains an  
32 emergency of international concern. In response to the pandemic, the UK government has  
33 implemented social distancing measures and nationwide lockdowns to control the spread of the  
34 virus (UK Government, 2020a). During these periods, the general public were limited in the  
35 distances they could travel and, at certain points, the number of times they could leave their  
36 residence each day; with an allowance of one non-essential trip during the peak of transmission (UK  
37 Government, 2020a). Though social restrictions have fluctuated in response to case rates, social  
38 distancing has been constant and there has been a general message throughout England of  
39 reduced movement and staying local where possible for much of 2020. These restrictions have  
40 meant that members of the public became more reliant on amenity spaces close to their residences  
41 for daily exercise and/or recreation (Geng et al., 2021). Green spaces may provide a comparatively  
42 safe place for these activities, though the amount and structure of green space available for public  
43 use differs widely across the UK. Here we evaluate if differences in the availability and structure of  
44 public green space within local authorities (local government bodies responsible for public services  
45 within a specified area) in England, and their usage, influenced the local rate of incidence of  
46 COVID-19.

47 Green spaces, which we define as vegetated non-arable areas - see Taylor & Hochuli (2017) for  
48 further details - provide important cultural and recreational ecosystem services, benefiting both  
49 mental and physical health (Beyer et al., 2014; Cohen-Cline et al., 2015). These benefits are usually  
50 considered in terms of reducing the prevalence or severity of conditions such as mental stress  
51 (Nutsford et al., 2013) or cardiovascular disease (Seo et al., 2019), and some of these benefits have  
52 continued throughout the pandemic (Slater et al., 2020; Soga et al., 2020). However, the influence  
53 of green space use on disease transmission rates has received less investigation, but is of great

54 importance as green space use has increased rapidly during the pandemic (Venter et al., 2020).  
55 Furthermore, it is unclear how 'safe' green spaces are during periods of higher incidence especially  
56 in densely populated areas (Shoari et al., 2020).

57 We anticipate that green space could impact COVID-19 incidence in two ways: general health and  
58 wellbeing, and transmission. It is conceivable that general health and well-being is greater in areas  
59 with more green space, as higher levels of green space are associated with healthier populations  
60 (Maas et al., 2006; Mitchell and Popham, 2007; van den Berg et al., 2015). As COVID-19 has a  
61 greater impact on those with underlying health conditions and sedentary lifestyles (Hamer et al.,  
62 2020; Jordan et al., 2020), green space may, therefore, indirectly provide some level of resilience to  
63 the disease and/or reduce incidence. However, our key focus here is on transmission, as it is likely  
64 that the major benefits of outdoor recreation in green space are related to a lower risk of infection.  
65 Current evidence suggests that COVID-19 is spread via droplet infections, contact with  
66 contaminated individuals or surfaces, and through aerosol transmission (Bahl et al., 2020). These  
67 risks are likely minimised in green space areas, as generally, they are less spatially confined, and  
68 with fewer surfaces prone to frequent touching or contact. Consequently, green space use may  
69 represent a safe form of recreation by minimising risk of infection.

70 In England and Wales approximately 87% of the population are within a 10-minute walk of public  
71 parks and gardens (Shoari *et al.* 2020). However, both the structure and amount of green space  
72 vary between local authorities, and both could influence COVID-19 incidence. Generally, it has been  
73 found that greater health benefits are derived from larger areas of green space (Ekkel and de Vries,  
74 2017). In the context of disease transmission, larger areas may offer more space per individual,  
75 lowering transmission risk. However, smaller fragmented areas of green space are common in  
76 many residential areas and are, therefore, more accessible to much of the population and may be  
77 used more frequently. Further, if public use is distributed across fragmented green spaces, the  
78 wider effects of a transmission incident could be reduced, as contacts would be isolated to the  
79 members of a neighbourhood or community adjacent to a particular green space. This process can  
80 be seen in animal diseases where habitat fragmentation reduces transmission due to limiting  
81 interactions between groups in different patches (Mccallum and Dobson, 2002). However,

82 fragmentation also typically results from reductions in the total area of green space (Fahrig, 2013),  
83 leading to less overall space per individual, possibly increasing transmission rates.

84 Whilst the effects of green space on COVID-19 transmission are currently unclear, other  
85 environmental and social factors are known to influence both the spread and severity of the  
86 disease. For example, human mobility drives the spread of infectious diseases (Kraemer et al.,  
87 2019) and studies have shown that reducing social interactions by restricting mobility can lead to a  
88 decrease in transmission rates of COVID-19 (Chinazzi et al., 2020; Gatto et al., 2020). Furthermore,  
89 as diseases are often spread along transport links and in offices (Gatto et al., 2020; Zhang et al.,  
90 2018), enforcing lockdown situations that curtail movement, such as requiring people to work from  
91 home, can have a great effect on reducing transmission rates. In addition to mobility, health and  
92 social factors have been associated with increased severity of the disease such as age, underlying  
93 health conditions, and deprivation (Richardson et al., 2020; Williamson et al., 2020). Consequently,  
94 any possible effects of green space must be considered after attempting to account for factors that  
95 could increase recorded incidence.

96 Given the stated benefits of green space, it is important to attempt to evaluate using available  
97 evidence, the impact of green space use on transmission rates. In addition, understanding the  
98 influence of green space on COVID-19 incidence could provide an estimate of the value of green  
99 space for maintaining public health if subjected to a resurgence of the COVID-19 pandemic. And, in  
100 the longer term, indicate the potential benefits of local green space on future pandemics of  
101 comparative severity. Here, using time series of COVID-19 cases within local authorities in  
102 England, we explore how both green space use and access (i.e. availability of green spaces)  
103 influence COVID-19 incidence. Our approach is to first construct a baseline transmission model to  
104 attempt to control for factors likely to influence recorded COVID-19 incidence and then to explore  
105 how green space influenced case rates above or below this baseline. We predict that green space  
106 and the way it is structured, in itself, will have no effect on case rates. However, we expect that an  
107 increase in park use (i.e. spending time in green space) will make the structure and availability of  
108 green space important (Figure 1). Specifically, when green space is low, park use will likely  
109 represent a safer form of movement (e.g. compared to shopping), unless the green space becomes

110 a congregation zone that inflates transmission risk. Furthermore, we predict that case rates will be  
111 lower when green space is fragmented, as the disease will be contained in more localised areas.  
112 For example, if the local authority has one large park the presence of an infected individual puts  
113 more people at risk than an infected individual attending one of many parks. Further, we predict, as  
114 others have found (Kraemer et al., 2020), that increased mobility will increase incidence, but that  
115 park use (measured as relative use of parks) is the safest form of mobility (e.g. preferable over  
116 shopping).

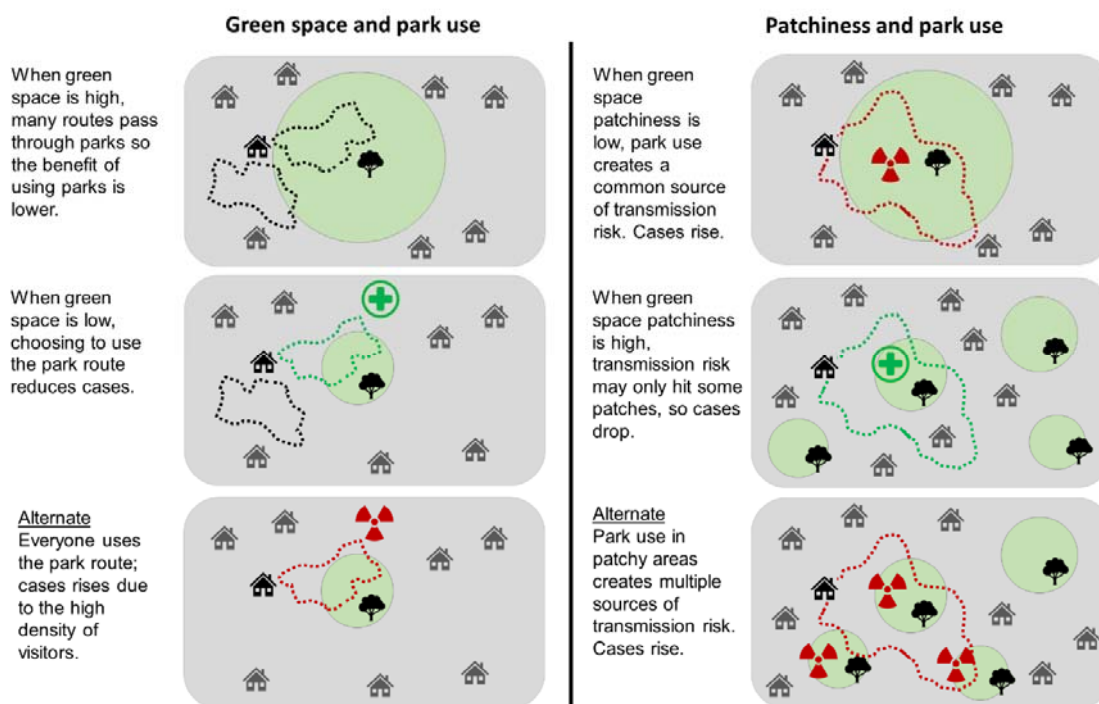

117

118 **Figure 1.** Mechanisms by which green space and patchiness could interact with park use to influence  
119 COVID-19 transmission. The upper two rows describe the primary predictions, whilst the bottom row explains  
120 alternate predictions. All variables (e.g. population density) except green space and patchiness, respectively,  
121 are held at a constant in these predictions. Green circles with a tree icon indicate the presence of green  
122 space. Dotted lines indicate walking routes, which becomes park use when the line overlaps a green space.  
123 The green health symbol indicates that the landscape metric and park use is beneficial, whilst the red toxic  
124 symbol indicates a risk.

## 125 2. Methods

### 126 2.1 Data compilation

#### 127 2.1.1 COVID-19 case rates

128 We compiled daily lab-confirmed cases (incidence) of COVID-19 in England from February 15<sup>th</sup>  
129 2020 up to 30<sup>th</sup> November 2020 (available from <https://coronavirus.data.gov.uk/>). We only included  
130 cases until November, as in December England began an aggressive vaccination campaign and the  
131 more infections COVID B1.1.7 variant began to spread widely – factors that could confound our  
132 models (see below). Cases were recorded at the lower tier local authority (administrative areas for  
133 local government) level (N = 299). These local authorities vary in size (3 – 26,000km<sup>2</sup>),  
134 demographics, cultures, and in socio-economic circumstances. Incidence over this time was highly  
135 variable with periods of rapid increases, which were then relatively controlled by periods of national  
136 lockdown (Figure 2). To determine factors influencing COVID-19 transmission, we estimated case  
137 rates for each day in each local authority. Case rates were derived by fitting log-linear models,  
138 regressing the natural log of daily cases against date (days). To reduce the effect of noise, we fit  
139 these regressions over 7-day moving windows (Figure S1) e.g. to estimate the case rate on March  
140 4<sup>th</sup>, a regression was fit between cases from March 1<sup>st</sup> – 7<sup>th</sup>, for March 5<sup>th</sup> a regression was fit  
141 between March 2<sup>nd</sup> – 8<sup>th</sup>. The coefficients of these models provided a daily case rate. We converted  
142 these coefficients into a daily percentage change in cases.

143

144

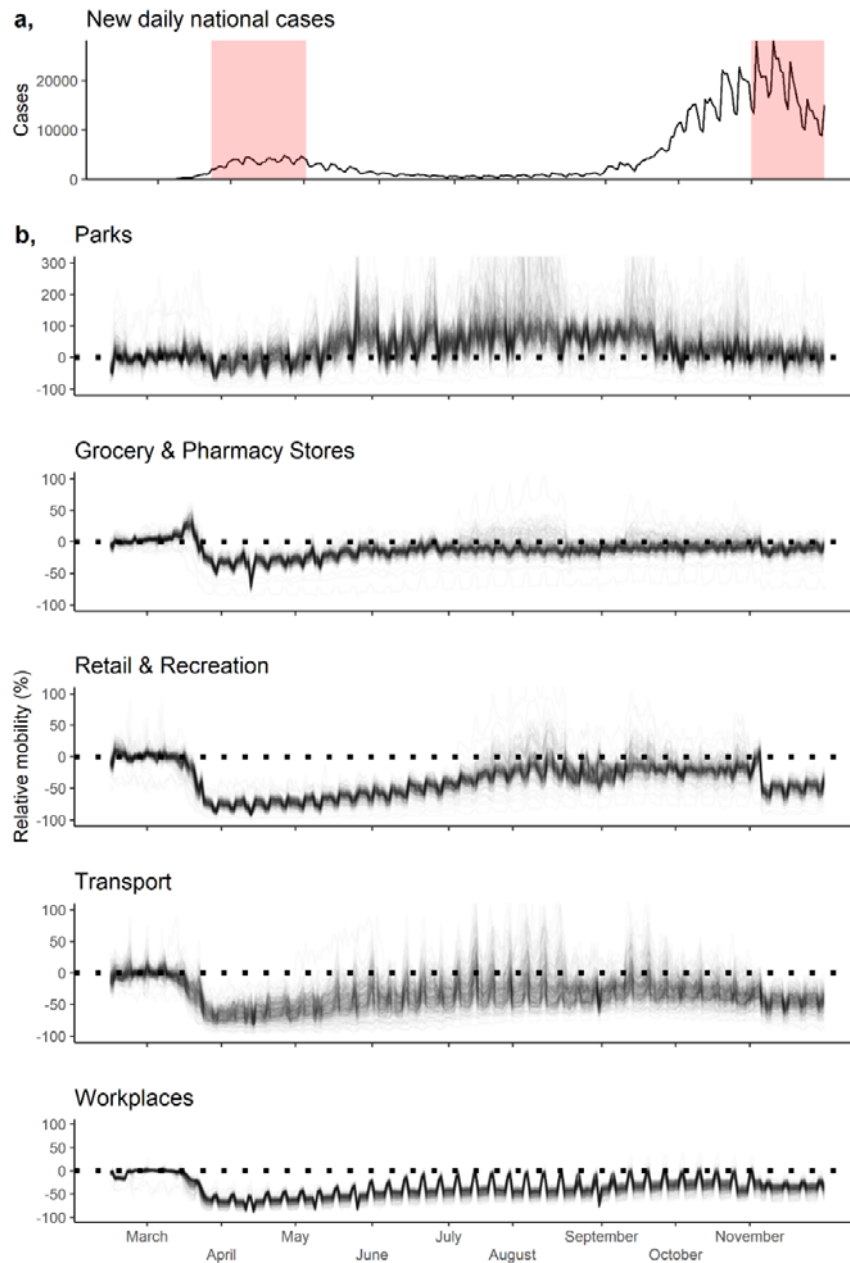

145

146 **Figure 2.** a) Daily lab-confirmed cases across England, with lockdown periods (with restricted mobility)  
147 indicated with red shading. b) Google mobility trends (Google, 2020), describing change in mobility over time  
148 for five different categories, relative to a baseline period (3<sup>rd</sup> of January to the 6<sup>th</sup> of February 2020). We  
149 excluded the sixth category 'residential mobility' as it is measured differently to all other categories. Each line  
150 within the mobility trends represents a local authority. All plots extend from the 15<sup>th</sup> of February 15<sup>th</sup> to the 30<sup>th</sup>  
151 of November 30<sup>th</sup> 2020. For the 'parks' plot, we limited the y-axis at 300% to exclude a small number of  
152 extreme observations with high park use.

153

154 *2.1.2 Baseline transmission variables*

155 We compiled variables which describe the mechanisms considered to influence case rates (Table  
156 1). Firstly, we derived two variables which describe the structure of the local authority population:  
157 population density – residential population density (controls for green space in the green  
158 transmission model below); and population clustering – Moran’s I spatial autocorrelation of  
159 residential population density (controls for patchiness in the green transmission model below).  
160 Secondly, we compiled three variables which characterise the human population in each local-  
161 authority prior to COVID-19: health – risk of premature death or a reduction in quality of life due to  
162 poor mental or physical health (Ministry of Housing Communities & Local Government, 2019);  
163 demography - the percentage of the population over 70 (Office for National Statistics, 2021a);  
164 economy – the percentage of unemployed-individuals in the non-retired local authority population  
165 (UK Government, 2018). A high baseline health, whereby few individuals have pre-existing  
166 underlying health conditions, may decrease the chances of an individual presenting with severe  
167 symptoms of COVID-19 and further passing the virus to others (Clark et al., 2020). Accounting for  
168 this baseline health may also assist in controlling for the presence of asymptomatic undetected  
169 infections in case rates.

170



171 **Table 1.** Description of variables within the baseline and green transmission models, including the  
 172 scale at which the variable is measured, where ‘Static’ indicates only one value is derived per local  
 173 authority, whilst there are unique values for each case rate in ‘Timeseries’ variables.

| Variable                           | Description                                                                                                                                                                                                                                                                                                                                                                                                                                                                              | Scale      |
|------------------------------------|------------------------------------------------------------------------------------------------------------------------------------------------------------------------------------------------------------------------------------------------------------------------------------------------------------------------------------------------------------------------------------------------------------------------------------------------------------------------------------------|------------|
| <i>Baseline transmission model</i> |                                                                                                                                                                                                                                                                                                                                                                                                                                                                                          |            |
| Population density                 | Local authority population size in mid-year 2019 divided by local authority area [in sq.km]. Source: Office for National Statistics (2021c)                                                                                                                                                                                                                                                                                                                                              | Static     |
| Population clustering              | Moran’s I spatial autocorrelation of residential population density in 2011, extracted from the UK’s gridded 1km resolution population raster. Source: UK Government (2020b)                                                                                                                                                                                                                                                                                                             | Static     |
| Health                             | The health aspect of the multiple deprivation index, describing the risk of premature death or a reduction in quality of life due to poor mental or physical health. Low values indicate greater health deprivation. Source: Ministry of Housing Communities & Local Government (2019)                                                                                                                                                                                                   | Static     |
| Demography                         | Percent of local authority population aged over 70 in June 2019. Source: Office for National Statistics (2021b)                                                                                                                                                                                                                                                                                                                                                                          | Static     |
| Economy                            | Percent of local authority population (adult non-retired) unemployed in December 2019. Source: UK Government (2020c)                                                                                                                                                                                                                                                                                                                                                                     | Static     |
| Mobility change                    | Daily mean overall mobility in each local authority across five of the Google mobility metrics: transport, workplaces, parks, grocery & pharmacy stores, and retail & recreation. Overall mobility averaged over the previous 2 to 12 days before each case rate. Source: Google (2020)                                                                                                                                                                                                  | Timeseries |
| Community cases                    | Seven-day rolling average in cases within each local authority. Variable also included within the green transmission model. Source: <a href="https://coronavirus.data.gov.uk/">https://coronavirus.data.gov.uk/</a>                                                                                                                                                                                                                                                                      | Timeseries |
| <i>Green transmission model</i>    |                                                                                                                                                                                                                                                                                                                                                                                                                                                                                          |            |
| Green space                        | Green space per person (m <sup>2</sup> ). Derived by dividing total green space area in each local authority by the local authority’s population size. We consider green spaces as any area meeting the following land cover types: broadleaved woodland, coniferous woodland, improved grassland, neutral grassland, calcareous grassland, acid grassland, fen, marsh and swamp, heather, heather grassland, and bog. Source: Rowland et al. (2017)                                     | Static     |
| Patchiness                         | Median frequency of parks within a 1km buffer around local authority houses. Source: Office for National Statistics (2021a)                                                                                                                                                                                                                                                                                                                                                              | Static     |
| Park use                           | Contribution of park use to the overall mobility metric, derived by extracting the residuals of a linear model between park mobility (response) and overall mobility (predictor) within each local authority. A positive residual value indicates park use exceeds what we would expect given park and overall mobility trends within the local authority. As with the mobility change variable, park use is averaged over the 2 to 12 days before each case rate. Source: Google (2020) | Timeseries |

174

175

176 National lockdowns, and the resulting reduction in people's mobility, were an important tool for  
177 reducing transmission within England during the COVID-19 pandemic. We used Google Community  
178 Mobility Reports to track human mobility and its effect on case rates (Google, 2020). These reports  
179 chart movement trends over time across six categories: retail and recreation, groceries and  
180 pharmacies, transit stations, workplaces, residential, and parks. These trends describe how visitors  
181 to, or time spent in, each of the six categories changed compared to a pre-pandemic 5-week period  
182 (the median value from 3<sup>rd</sup> January to 6<sup>th</sup> February 2020). As the mobility data contained missing  
183 values (c.12%) for some local authorities and dates (Figure S2), we were conscious these missing  
184 values may lead to statistical inference errors within the models below. As a result, we filled missing  
185 mobility values using *mice: multiple imputation chained equations* R package and '2l.pan' imputation  
186 approach, which is a hierarchical normal model within homogenous within group variances (Van  
187 Buuren and Groothuis-Oudshoorn, 2011). This hierarchical structure allowed us to model mobility  
188 trends accounting for differences in local authorities. We included the following terms within our  
189 imputation model: all six Google mobility timeseries, as well as a 1-day lag period for each  
190 timeseries, the number of days along the timeseries since February 15<sup>th</sup> with a cubic polynomial  
191 term, an indicator variable to describe whether each day was a weekend or not, and the timeseries  
192 of daily COVID-19 cases within the local authority. We also included terms that didn't vary through  
193 time, including: the latitude and longitude of the local authority, and all local authority covairates  
194 within the baseline and green transmission models below (population density, population clustering,  
195 health, demography, economy, green space, and patchiness). Finally, we also included some  
196 national metrics that could infleunce local mobility, including: a timeseries of daily COVID-19 cases  
197 measured at the national scale, as well as the mean daily temperature and precipitation within  
198 Central England. We ran this model through 10 chains, each with 20 iterations, and 20 pan  
199 iterations. The imputation model converged.

200 Conventionally, as part of a multiple imputation framework, these 10 chains should then be  
201 modelled seperately and coefficient standard errors should be inflated with Rubin's rules (Little and  
202 Rubin, 2002). However, given the small percentage of missing values, and that there are currently  
203 no well defined steps for using Rubin's rules in genralized additive models (see our models below),

204 we instead averaged mobility values across the 10 chains to produce mean estimates of mobility for  
205 each category, day, and local authority i.e. conducting single imputation. We ensured the  
206 imputations produced plausible values (Figure S3). From this mobility dataset, we derived a variable  
207 which described overall mobility change for each date in each local authority, which is the average  
208 mobility change across five of the six categories (excluding residential) for each day in each local  
209 authority. We excluded the residential mobility category as it is inversely correlated with all other  
210 categories and is measured differently (Google, 2020). However, as there is a delay between a  
211 mobility reduction and a case rate reduction, we lagged the overall mobility change metric by linking  
212 each case rate with the mean mobility change from 2 – 12 days prior.

### 213 *2.1.3 Green variables*

214 We compiled two variables which describe the structure of green spaces in each local authority:  
215 patchiness – median frequency of parks within a 1km<sup>2</sup> radius around households in the local  
216 authority (Office for National Statistics, 2021c); green space – available green space per person  
217 (m<sup>2</sup>) within the local authority, derived by dividing the green-cover area by the local authority  
218 population size. Green-cover area was calculated from the UKCEH 2015 25metre land cover raster  
219 (Rowland et al., 2017) and included the following landscape categories: broadleaved woodland,  
220 coniferous woodland, improved grassland, neutral grassland, calcareous grassland, acid grassland,  
221 fen, marsh and swamp, heather, heather grassland, and bog. For this green-cover area calculation,  
222 we set a 1km buffer around the local authority, to represent green space access of households on  
223 the local authority border.

224 Using the mobility dataset, we also produced a park use variable, which represents how parks are  
225 used relative to overall mobility. This park use metric is derived by fitting a linear model between  
226 park use and overall mobility within each local authority, and extracting the residual park use, where  
227 positive values represent a preference for using parks over other forms of mobility for a given date  
228 (in the original percentage units). Parks include public gardens, castles, national forests, campsites,  
229 observation points, and national parks, but exclude surrounding countryside in rural areas. As a  
230 result, the Google (2020) definition of parks differs slightly to the landscape categories used in our

231 green space metric but are our best available representation of how green space was used during  
232 the pandemic. As in the overall mobility change metric, park use represents the mean use of parks  
233 in the prior 2 to 12 days.

## 234 2.2 Modelling

235 We developed two core models (Figure 3): baseline transmission – aimed at controlling for the  
236 major mechanisms influencing case rates; and green transmission – impact of landscape structure  
237 and park use on case rates. The baseline and green transmission models are both focussed on  
238 case rates, but we anticipated that any effects of green space on COVID-19 case rates were likely  
239 to be much smaller than variables known to influence disease transmission (e.g. population  
240 density). As a result, we structured our analyses to first account for the presence of these more  
241 influential variables in a baseline transmission model, and then in the green transmission model, we  
242 explored how green areas (the focus of this study) can alter the residuals of these case rates.  
243 Conventionally, it is advised to include all variables within one regression instead of analysing the  
244 residuals separately (Freckleton, 2002). However, variables were highly correlated (e.g. population  
245 density and green space are derived in similar ways), and resulted in multicollinearity issues.  
246 Dealing with the major mechanisms first (e.g. population density) mitigated these multicollinearity  
247 issues.

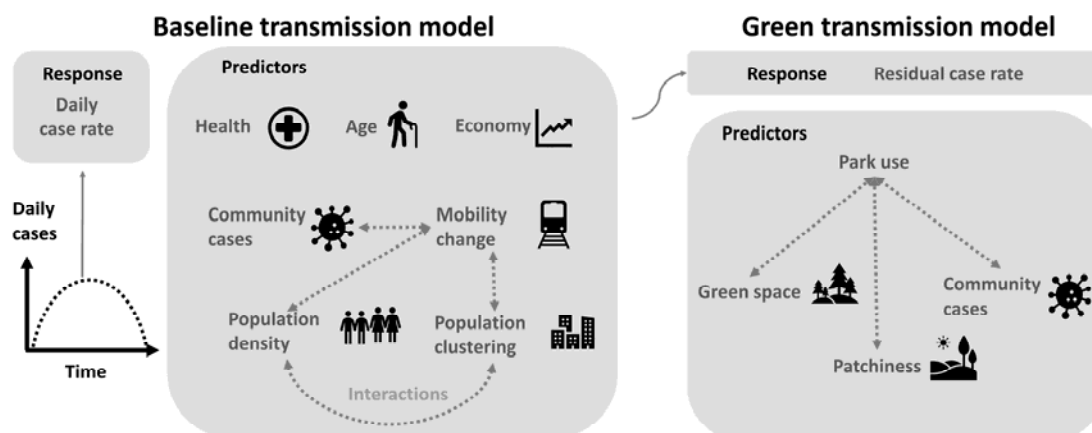

248

249 **Figure 3.** Model structure for baseline transmission and green transmission difference models, depicting the  
250 process for developing the response variables, as well as the predictors used in each model.

251 To control for the baseline health and transmission mechanisms influencing COVID-19 case rates,  
252 we developed a generalized additive model within the *mgcv* R package (Wood, 2021), with case  
253 rate as the response – inverse hyperbolic sine transformed to address heavy tailed residuals. We  
254 included the following parameters as linear predictors: health, demography, economy, population  
255 density ( $\log_{10}$  transformed), population clustering, and mobility change. We also included  
256 interactions between population density and clustering, population density and mobility change, and  
257 population clustering and mobility change. In model development, it was clear that the residuals  
258 were experiencing extreme positive temporal autocorrelation, where case rate values were very  
259 similar to values from the previous day. As a result, we also included the previous days case rate  
260 (one day lag) as a linear predictor in the model. We included random intercept smoothing over the  
261 local authorities to account for the non-independence of multiple case rates within the same local  
262 authorities. Due to working hour restrictions in the England, case counts on Saturdays and Sundays  
263 were largely underestimated, and then over-estimated on Mondays and Tuesdays. As a result, we  
264 also included a cyclic smoothing term (with up to 7 knots) over day of the week to capture reporting  
265 biases and control for daily variation (days within a week) in case reporting. We extracted the  
266 residuals from this model for the green transmission model.

267 To assess how landscape structure and park use influenced residual case rates, we again  
268 developed a generalized additive model developed, with residual case rates from the baseline  
269 transmission models as the response, as well as the following linear predictor parameters: park use,  
270 green space ( $\log_{10}$  transformed), patchiness, as well as interactions between park use and green  
271 space, and park use and patchiness. These models also included random intercept smoothing over  
272 local authorities, but we did not control for the smoothing over days of the week, which was  
273 addressed in the earlier baseline transmission model.

#### 274 *2.2.1 Sensitivity analysis*

275 We opted to fill missing mobility values with imputation instead of using complete-case analyses,  
276 where any observations with missing mobility data are removed. However, given the small  
277 percentage of missing values, and that the mobility data is averaged across five categories, and

278 then again through time, we wanted to ensure model coefficients did not change drastically under  
279 imputation, which could be a sign of a statistical inference error (Johnson et al., 2021). As a result,  
280 we repeated the analyses using only complete-case observations and compared model coefficients  
281 between the missing value approaches. Given the similarity in the complete-case and imputation  
282 coefficients (Figure S4), we continued using the coefficients from the imputation model which  
283 covered a greater array of local authorities.

284 In both the baseline and green transmission models, we were conscious that some parameter  
285 effects may have varied through time. For example, some covariates may have been particularly  
286 influential prior to mandatory mask wearing in shops on July 24<sup>th</sup> 2020. As a result, we extracted the  
287 first four weeks of data from our case rate dataset and ran the models on this subset. We then  
288 shifted the data forwards one week and re-ran the models, repeating this procedure (moving  
289 window), creating 40 replicates of the coefficients each representing a different-overlapping period  
290 of time between February and November 2020. From this, we established that the majority of  
291 coefficients were stable over time (Figure S5), but the mobility covariates (mobility change and park  
292 use) were highly variable, and mobility effects were greatest when cases were at their highest. As a  
293 result, we amended the baseline and green transmission models to include an interaction between  
294 the mobility variables and the number of cases (averaged over the nearest 7 days) in the local  
295 authority at a given moment in time (see Equation S1-2 for the final model structures). We also  
296 noted that effects were greatest in the first lockdown but also fluctuated substantially. We suspect  
297 the large effects are genuine, but given there were temporal and spatial issues with case-testing  
298 availability in the first lockdown, we opted to remove this section of data to limit biases. The final  
299 dataset covered June 1<sup>st</sup> to November 30<sup>th</sup>.

### 300 *2.2.2 Model checking*

301 We standardised (subtracting values from their mean and dividing by their standard deviation) all  
302 predictor variables in the models to determine effect sizes and reduce multicollinearity where  
303 interactions are present. All model assumptions passed e.g. multicollinearity (variance inflation  
304 factors less than 3 within both the baseline and green transmission model), concavity (observed

305 and estimated concavity less than 0.1), absence of spatial (Moran's  $I = 0.1$ ) and temporal  
306 autocorrelation (Figure S6), homogeneity of variance, and normality of residuals. When  
307 summarising results, we report the mean  $\pm$  standard deviation, and when describing model outputs  
308 we report the standardised slope coefficient and 95% confidence intervals. We also report the  $R^2$  for  
309 each model. All analyses was conducted in R 4.0.3 (R Development Core Team, 2020).

### 310 *2.2.3 Projecting cases*

311 To understand how mobility patterns have influenced cases, we projected cases using the baseline  
312 and green transmission models under three scenarios: 1) cases under observed mobility patterns;  
313 2) cases after a 20% reduction in each day's overall mobility; 3) cases after a 20% increase in each  
314 day's park use. We ran the baseline and green transmission models through each of the scenarios  
315 for every local authority between March 1<sup>st</sup> and November 30<sup>th</sup> 2020. We standardised all authorities  
316 so they had the same starting number of cases (10), community cases (10), and lagged case rate  
317 (0.58%; the mean case rate across local authorities on March 1<sup>st</sup>). These cases, community cases,  
318 and lagged case rate were updated and iteratively informed by the new model predictions, instead  
319 of the observed data. As a result, the projected case rates are solely influenced by the landscape  
320 structure and mobility patterns in the local authority. We converted the projected case rates into  
321 projected cases, against the starting case value of 10.

## 322 **3. Results**

323 Across the 299 local authorities, case rates fluctuated substantially through time (Figure 4a).  
324 Mobility declined substantially during the first national lockdown in March to May, and in the run up  
325 to winter (Figure 4b). During the summer months, mobility and the variance in mobility increased,  
326 and in some local authorities these increases were close to 100% (doubling mobility). In contrast,  
327 park use increased during the first lockdown and remained high (approximately 25% above  
328 baseline) until winter approached in October (Figure 4c). There was less variation in park use trends  
329 between local authorities than in the mobility change metric.

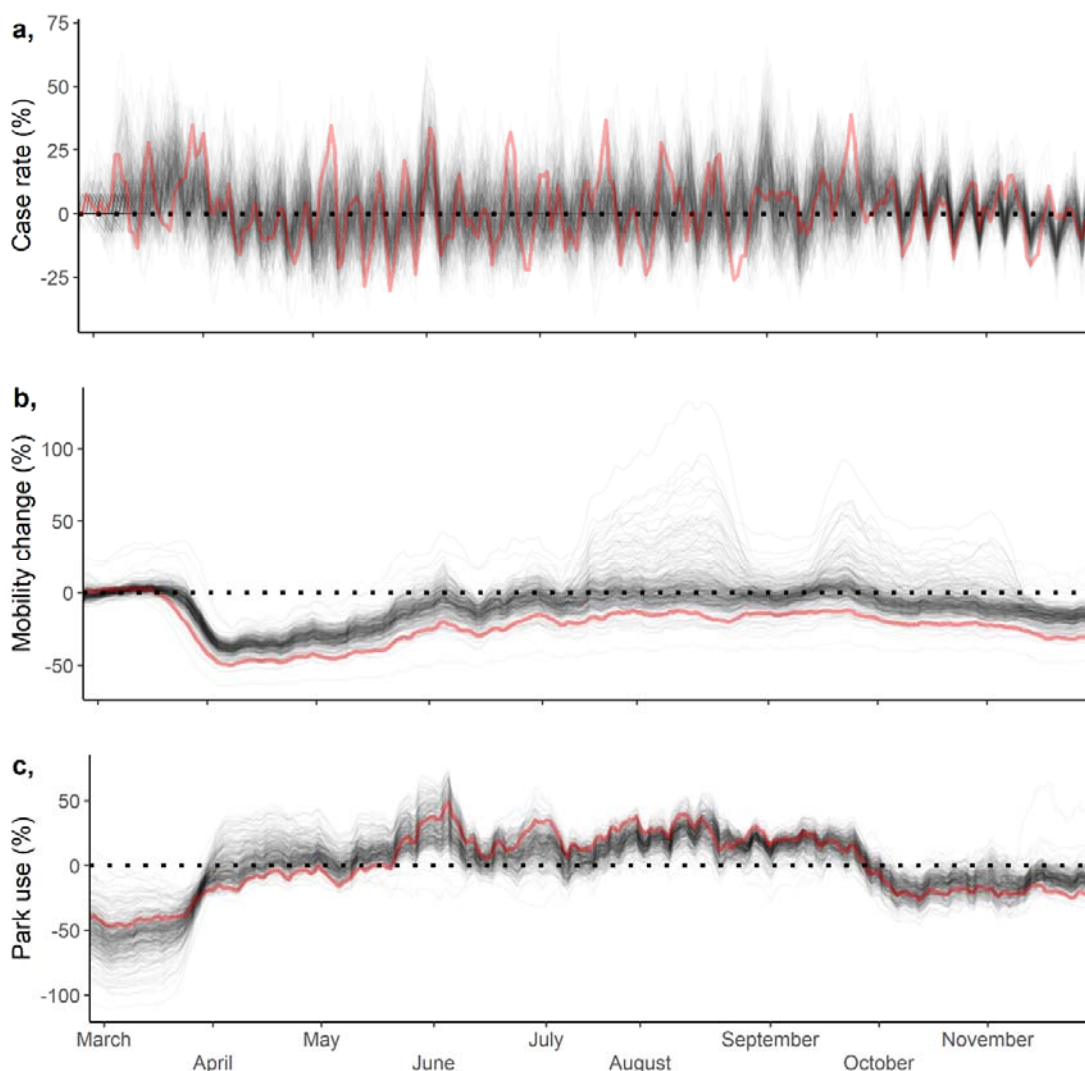

330

331 **Figure 4.** a) Temporal patterns in case rates (a), mobility change (b) and park use (c) between March 1<sup>st</sup> and  
332 November 30<sup>th</sup> 2020, with each line representing a different local authority. The red line represents the Oxford  
333 local authority and acts purely as an example. Case rates are defined as the daily percentage change in  
334 cases calculated over a seven day moving average. Mobility change is the mean daily percentage change  
335 over five mobility types (Park, Grocery and Pharmacy stores, Retail and recreation, Transport, and  
336 Workplaces) extracted from Google community mobility reports (Google, 2020). Park use is the relative  
337 contribution of park mobility to overall mobility change, derived by extracting the residuals of a linear model  
338 with park mobility regressed against overall mobility within each local authority i.e. are people visiting parks  
339 more than we would expect on a given date.

### 340 3.1 Baseline transmission models

341 A reduction in mobility was associated with a decline in case rates, and changes in mobility had a  
342 larger impact when there was a higher number of average cases and when the population was



343 more clustered (Table 2; Figure 5c, d). Population density and population clustering had no  
 344 significant impact on case rates. Increases in the health index and proportion of the population over  
 345 the age of 70 were both associated with significant decreases in case rates (Table 2; Figure 5a, b).  
 346 This baseline transmission model had an  $R^2$  of 0.45.

347 **Table 2.** Estimated regression parameters from the baseline and green transmission models with 95  
 348 confidence intervals. Values rounded to two significant figures, those with confidence intervals not overlapping  
 349 zero (i.e. significant at the  $p = 0.05$  threshold) are shown in bold.

|                                          | Coefficient [95% confidence intervals] |
|------------------------------------------|----------------------------------------|
| <i>Baseline transmission model</i>       |                                        |
| Intercept                                | <b>0.40 [0.37, 0.42]</b>               |
| Lag case rate                            | <b>1.56 [1.55, 1.58]</b>               |
| Population density                       | 0.020 [-0.0084, 0.048]                 |
| Population clustering                    | 0.013 [-0.0041, 0.030]                 |
| Mobility                                 | <b>0.16 [0.14, 0.18]</b>               |
| Case average                             | <b>0.080 [0.052, 0.11]</b>             |
| Baseline health                          | <b>-0.025 [-0.049, -0.0015]</b>        |
| Percentage over 70                       | <b>-0.060 [-0.088, -0.033]</b>         |
| Percentage unemployed                    | 0.0059 [-0.020, 0.032]                 |
| Mobility:Community cases                 | <b>0.13 [0.095, 0.15]</b>              |
| Population density:Population clustering | 0.0068 [-0.010, 0.024]                 |
| Population density:Mobility              | 0.0029 [-0.012, 0.018]                 |
| Population clustering:Mobility           | <b>0.029 [0.012, 0.047]</b>            |
| <i>Green transmission model</i>          |                                        |
| Intercept                                | 0.0077 [-0.013, 0.028]                 |
| Park use                                 | <b>-0.096 [-0.12, -0.071]</b>          |
| Green space                              | -0.0068 [-0.028, 0.015]                |
| Patchiness                               | 0.013 [-0.0086, 0.034]                 |
| Case average                             | <b>-0.047 [-0.070, -0.024]</b>         |
| Park use:Green space                     | <b>0.023 [0.00086, 0.44]</b>           |
| Park use:Patchiness                      | <b>0.022 [0.00017, 0.043]</b>          |
| Park use:Community cases                 | 0.012 [-0.0087, 0.033]                 |

350

351

352

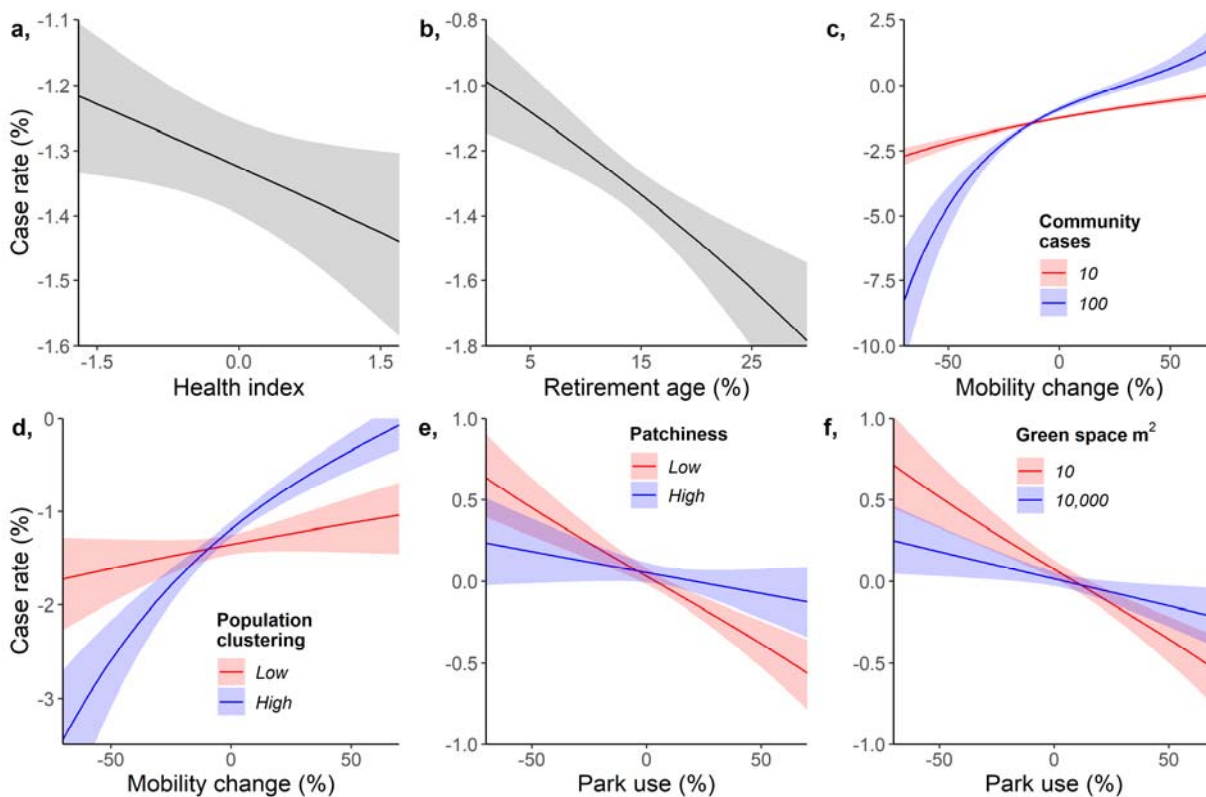

353

354 **Figure 5.** Marginal effects of important interaction parameters in the baseline transmission and in the green  
 355 transmission models. Marginal effects are held at zero for all other parameters as variables were z-  
 356 transformed. Panels depict the effect of: a) health, with low values indicating health deprivation; b) the  
 357 percentage of the population over 70; c) an interaction between mobility and community cases (the 7-day  
 358 average number of cases in the local authority); d) an interaction between mobility and human population  
 359 clustering set at 0.2 (Low) and 0.7 (High), where 0 indicates a random distribution of clustering, and 1  
 360 indicates a complete separation in clustering; e) an interaction between park use and patchiness (the median  
 361 frequency of parks within 1km of each house in a local authority); and f) an interaction between park use and  
 362 green space area per local authority capita. Error bars represent the 95 confidence intervals.

363

### 364 3.2 Green transmission models

365 Park use was associated with decreased residual case rates (Table 2; Figure 5e) but the size of the  
 366 effect depended on the availability of green space and how patchy it was. When patchiness was  
 367 high and when there was a large amount of greenspace, park use had less of an impact on case  
 368 rates, though was still associated with a significant reduction in cases. The green transmission  
 369 model had a small  $R^2$  of less than 0.01, despite the significant effects.

370

371 3.3 Projected cases

372 Reducing mobility is a far more effective measure of limiting COVID-19 transmission than increasing  
373 park use (Figure 6). Across local authorities between March and November 2020, a 20% reduction  
374 in mobility is projected to have led to 33% fewer cases on average, and in some cases more than  
375 50% fewer cases (Figure 6b). In contrast, a 20% increase in park use rarely exceeds a 10%  
376 reduction in cases (Figure 6c). So whilst park use is associated with reducing COVID-19  
377 transmission, these benefits would only be relatively small. However, there is spatial variation in  
378 these findings, with some areas potentially benefitting more than others from a reduction in mobility  
379 or increase in park use (Figure 7).

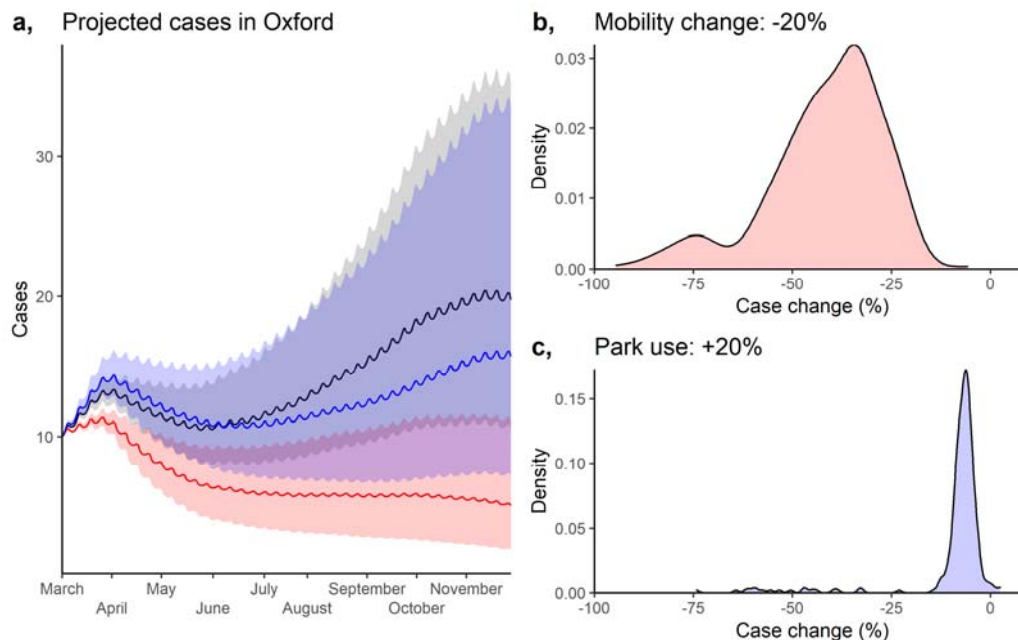

380

381 **Figure 6.** a) Projected daily cases between March 1<sup>st</sup> and November 30<sup>th</sup> 2020 within Oxford under three  
382 scenarios: 1) observed mobility patterns (black); 2) a further 20% reduction in observed mobility (red); and 3)  
383 20% increase in observed park use (blue). In these projections, we set the initial cases (on March 1<sup>st</sup>) at 10,  
384 and with lagged case rate of 0.58% - the mean value across local authorities on February 28<sup>th</sup>. All other  
385 covariates were held at their observed values. Error ribbons represent 95% confidence intervals. Panels b and  
386 c represent the distribution of projected change in cases across local authorities under the 20% mobility  
387 reduction (b) and 20% park use increase (c) scenarios i.e. how much could cases have been reduced under  
388 these scenarios. Case change was derived by dividing the total cases between the March and November  
389 periods under each scenario by the cases in the observed mobility scenario (black), multiplying this value by  
390 100, and then subtracting by 100.

391

392

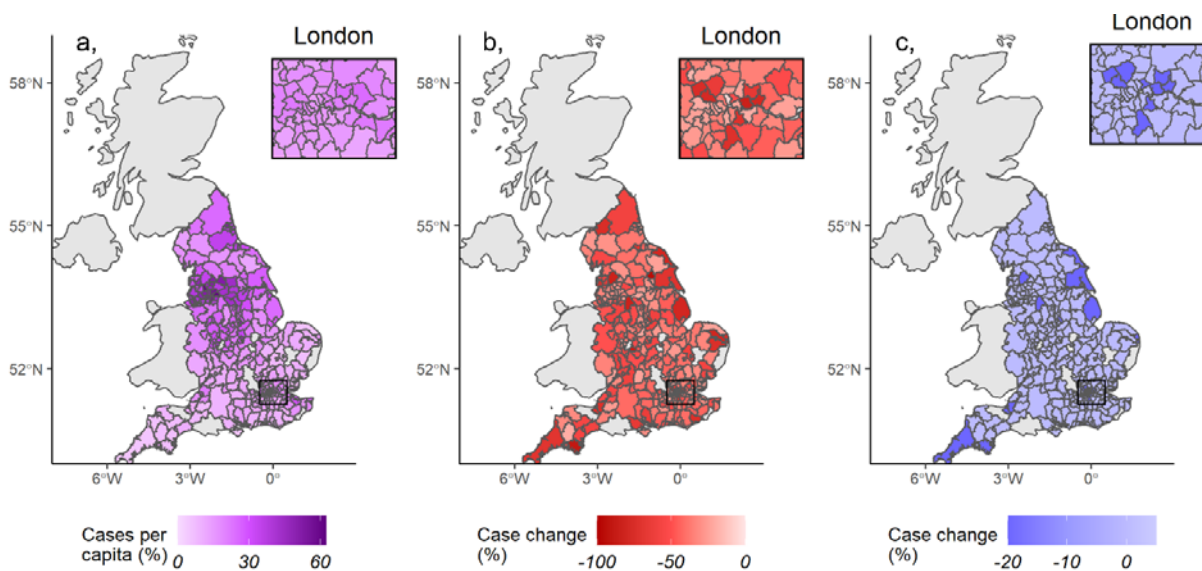

393

394 **Figure 7.** Spatial variation in observed cases per capita (a), and projected case changes under a 20%  
395 mobility reduction (b) and 20% increase in park use (c). Case change was derived by dividing the total cases  
396 between March and November 2020 under each scenario by the cases in the observed mobility projection,  
397 multiplying this value by 100, and then subtracting by 100 (see Figure 5).

398

#### 399 4. Discussion

400 In this study, we attempted to quantify the effects of local green space on COVID-19 case rates  
401 after accounting for mechanisms known to influence pandemics in our baseline transmission model.  
402 We found that high overall mobility was associated with increased case rates, especially when  
403 population clustering was high. After accounting for these variables, we found that higher park use,  
404 compared to other amenity areas, was associated with a reduction in case rates, especially in local  
405 authorities with low green space and with contiguous green space. These results suggest that  
406 utilising green spaces rather than carrying out other activities (e.g. visiting shops and workplaces)  
407 may reduce the transmission rate of COVID-19, but these benefits are limited compared to reducing  
408 mobility more generally.

409 From our baseline transmission model results, case rates were lower in local authorities with  
410 healthier populations and older populations (Figure 5a-b). These results are logical, firstly as

411 previous evidence has shown COVID-19 has a greater impact on those with underlying health  
412 conditions (Hamer et al., 2020; Jordan et al., 2020) and more severe cases may be more likely to  
413 be tested and reported. Secondly, whilst the elderly are more at risk of mortality from COVID-19  
414 (Williamson et al., 2020), this fact was widely reported in public health guidance and older people  
415 may have reduced contact with other individuals (Canning et al., 2020) Our baseline transmission  
416 model also shows that reducing mobility is most valuable when community cases are high and in  
417 areas with high population clustering (Figure 5c-d). This is consistent with person-person contact as  
418 the major mechanism of transmission and appears to demonstrate the general effectiveness of  
419 lockdown measures in reducing case rates, as others have demonstrated previously (Davies et al.,  
420 2020; Lau et al., 2020). Mobility had less impact in low clustered areas, which again may be  
421 expected, as people are more likely to be able to maintain distance and the potential number of  
422 interactions is reduced.

423 Once we had accounted for known drivers of case-rates, we investigated how landscape structure  
424 and park use (i.e. mobility in green spaces) affected residual case rates using the green  
425 transmission model. Here we found that using parks, relative to other types of mobility, was  
426 associated with a reduction in case rates (Figure 5-6). However, reducing overall mobility (i.e.  
427 mobility to all amenity areas) led to a far more substantial decline in case rates. For example, a 20%  
428 reduction was projected to reduce cases by c.35%, whilst a 20% increase in park use was projected  
429 to reduce cases by 5% to 10% (Figure 6). This suggests that the use of parks may have modestly  
430 helped in reducing transmission rates in some areas during the pandemic, but reducing overall  
431 mobility is substantially more beneficial than maintaining mobility at pre-pandemic levels and  
432 spending that mobility in parks.

433 Whilst park use, overall, had a relatively small effect, we did note stronger effects of park use when  
434 the context of the local area was considered as using parks was beneficial in authorities with low  
435 green space and authorities with contiguous green space (Figure 5e-f and Figure 6). That park use  
436 has a minor beneficial effect overall seems to support our hypothesis that recreation in green space  
437 and parks may be safer than in other amenity areas. This is probably because it is easier to  
438 maintain distance and green spaces have fewer surfaces which could result in transmission if

439 contaminated. However, the limiting impact of this when green space is high and accessible seems  
440 to suggest diminishing returns in how park use can impact COVID-19 transmission. This is perhaps  
441 not surprising if the main value of parks in this context is as an alternative to other relatively more  
442 hazardous amenity areas. Consequently, if there are other safe options outside of public parks then  
443 parks will likely have little impact. However, our findings do suggest that the use of public parks in a  
444 highly urbanised area may be advantageous, though as noted above the strongest effect was from  
445 the reduction of all forms of mobility. Therefore, cautiously, and given that it corresponds with  
446 common sense, we suggest that reducing mobility is a successful strategy for reducing case rates  
447 but given a need for some non-essential time outside of a home, using green spaces such as local  
448 parks may be the next best thing, particularly in highly urbanised areas.

449 A major limitation of the work is the difficulty in comparing across local authorities that vary  
450 simultaneously in many different variables likely important to case rates. This makes inference  
451 about the importance of their individual effects very difficult and so effect sizes should be interpreted  
452 cautiously and with caveat. Another challenge is that pandemics are rare events, consequently, our  
453 analysis covers only a snapshot of time for each local authority. During this period, many different  
454 factors not included in the analysis (e.g. chance super spreading events) may have explained much  
455 of the variation between local authorities. Despite this, the model fits are reasonably high. An  
456 additional limitation in our analyses is the absence of complete Google mobility data in some local  
457 authorities. We handled these missing values with imputation and attempted to ensure models were  
458 robust by comparing imputed models with complete-case models. Encouragingly, our complete-  
459 case and imputed results are very similar, which suggests the imputation has not introduced any  
460 missing data bias (Johnson et al., 2021) – although both the imputation and complete-case analysis  
461 could just be equally wrong. Given this uncertainty, and the further limitations we have identified  
462 above, our mobility findings should be interpreted cautiously.

463 Understanding the risks of different amenity areas could be important for longer-term management  
464 of COVID-19 and the landscape-dependency of this advice could be important for developing 'local-  
465 lockdown' guidance. In particular, access to green spaces has been shown to have benefits for  
466 mental and physical well-being (Slater et al., 2020; Soga et al., 2020), and consequently,

467 understanding the relative risks of using these areas is important. Our results show that COVID-19  
468 case rates may be reduced with individuals spending time in parks, relative to other amenity areas,  
469 especially in urbanised, high-density areas. Although further research is needed, these findings  
470 suggest that the use of parks for recreational activity in these contexts could be advisable,  
471 demonstrating a possible additional utility of these green spaces in addition to the known benefits to  
472 health and wellbeing (de Vries et al., 2003; Mitchell and Popham, 2007; Nutsford et al., 2013) in  
473 normal non-pandemic conditions.

#### 474 **Acknowledgments**

475 Thanks to the NERC Covid-19 hackathon for instigating this work. This work was partly funded by  
476 the following NERC (Natural Environment Research Council) Centre for Doctoral Training  
477 studentships: J71566E, P012345, and L002566.

#### 478 **Data accessibility**

479 Code and data to repeat analysis are presented in  
480 [https://github.com/GitTFJ/COVID19\\_parks\\_landscape](https://github.com/GitTFJ/COVID19_parks_landscape)

#### 481 **Author contributions**

482 All authors contributed to project design. Analysis was led by TFJ and LCE, but all authors  
483 contributed. TFJ and LCE co-wrote the first draft and co-authors contributed to revisions.

#### 484 **References**

- 485 Bahl, P., Doolan, C., de Silva, C., Chughtai, A.A., Bourouiba, L., MacIntyre, C.R., 2020. Airborne or  
486 Droplet Precautions for Health Workers Treating Coronavirus Disease 2019? *J. Infect. Dis.*  
487 <https://doi.org/10.1093/infdis/jjaa189>
- 488 Beyer, K.M.M., Kaltenbach, A., Szabo, A., Bogar, S., Javier Nieto, F., Malecki, K.M., 2014.  
489 Exposure to neighborhood green space and mental health: Evidence from the survey of the  
490 health of wisconsin. *Int. J. Environ. Res. Public Health.*  
491 <https://doi.org/10.3390/ijerph110303453>

- 492 Canning, D., Karra, M., Dayalu, R., Guo, M., Bloom, D.E., 2020. The association between age,  
493 COVID-19 symptoms, and social distancing behavior in the United States. medRxiv.  
494 <https://doi.org/10.1101/2020.04.19.20065219>
- 495 Chinazzi, M., Davis, J.T., Ajelli, M., Gioannini, C., Litvinova, M., Merler, S., Pastore y Piontti, A., Mu,  
496 K., Rossi, L., Sun, K., Viboud, C., Xiong, X., Yu, H., Elizabeth Halloran, M., Longini, I.M.,  
497 Vespignani, A., 2020. The effect of travel restrictions on the spread of the 2019 novel  
498 coronavirus (COVID-19) outbreak. *Science* (80- ). <https://doi.org/10.1126/science.aba9757>
- 499 Clark, A., Jit, M., Warren-Gash, C., Guthrie, B., Wang, H.H.X., Mercer, S.W., Sanderson, C.,  
500 McKee, M., Troeger, C., Ong, K.L., Checchi, F., Perel, P., Joseph, S., Gibbs, H.P., Banerjee,  
501 A., Eggo, R.M., Nightingale, E.S., O'Reilly, K., Jombart, T., Edmunds, W.J., Rosello, A., Sun,  
502 F.Y., Atkins, K.E., Bosse, N.I., Clifford, S., Russell, T.W., Deol, A.K., Liu, Y., Procter, S.R.,  
503 Leclerc, Q.J., Medley, G., Knight, G., Munday, J.D., Kucharski, A.J., Pearson, C.A.B., Klepac,  
504 P., Prem, K., Houben, R.M.G.J., Endo, A., Flasche, S., Davies, N.G., Diamond, C., van  
505 Zandvoort, K., Funk, S., Auzenbergs, M., Rees, E.M., Tully, D.C., Emery, J.C., Quilty, B.J.,  
506 Abbott, S., Villabona-Arenas, C.J., Hué, S., Hellewell, J., Gimma, A., Jarvis, C.I., 2020. Global,  
507 regional, and national estimates of the population at increased risk of severe COVID-19 due to  
508 underlying health conditions in 2020: a modelling study. *Lancet Glob. Heal.*  
509 [https://doi.org/10.1016/S2214-109X\(20\)30264-3](https://doi.org/10.1016/S2214-109X(20)30264-3)
- 510 Cohen-Cline, H., Turkheimer, E., Duncan, G.E., 2015. Access to green space, physical activity and  
511 mental health: A twin study. *J. Epidemiol. Community Health*. [https://doi.org/10.1136/jech-](https://doi.org/10.1136/jech-2014-204667)  
512 [2014-204667](https://doi.org/10.1136/jech-2014-204667)
- 513 Davies, N.G., Kucharski, A.J., Eggo, R.M., Gimma, A., Edmunds, W.J., Jombart, T., O'Reilly, K.,  
514 Endo, A., Hellewell, J., Nightingale, E.S., Quilty, B.J., Jarvis, C.I., Russell, T.W., Klepac, P.,  
515 Bosse, N.I., Funk, S., Abbott, S., Medley, G.F., Gibbs, H., Pearson, C.A.B., Flasche, S., Jit, M.,  
516 Clifford, S., Prem, K., Diamond, C., Emery, J., Deol, A.K., Procter, S.R., van Zandvoort, K.,  
517 Sun, Y.F., Munday, J.D., Rosello, A., Auzenbergs, M., Knight, G., Houben, R.M.G.J., Liu, Y.,  
518 2020. Effects of non-pharmaceutical interventions on COVID-19 cases, deaths, and demand



- 519 for hospital services in the UK: a modelling study. *Lancet Public Heal.*
- 520 [https://doi.org/10.1016/S2468-2667\(20\)30133-X](https://doi.org/10.1016/S2468-2667(20)30133-X)
- 521 de Vries, S., Verheij, R.A., Groenewegen, P.P., Spreeuwenberg, P., 2003. Natural environments -  
522 Healthy environments? An exploratory analysis of the relationship between greenspace and  
523 health. *Environ. Plan. A.* <https://doi.org/10.1068/a35111>
- 524 Ekkel, E.D., de Vries, S., 2017. Nearby green space and human health: Evaluating accessibility  
525 metrics. *Landsc. Urban Plan.* <https://doi.org/10.1016/j.landurbplan.2016.06.008>
- 526 Fahrig, L., 2013. Rethinking patch size and isolation effects: The habitat amount hypothesis. *J.*  
527 *Biogeogr.* <https://doi.org/10.1111/jbi.12130>
- 528 Freckleton, R.P., 2002. On the misuse of residuals in ecology: Regression of residuals vs. multiple  
529 regression. *J. Anim. Ecol.* <https://doi.org/10.1046/j.1365-2656.2002.00618.x>
- 530 Gatto, M., Bertuzzo, E., Mari, L., Miccoli, S., Carraro, L., Casagrandi, R., Rinaldo, A., 2020. Spread  
531 and dynamics of the COVID-19 epidemic in Italy: Effects of emergency containment measures.  
532 *Proc. Natl. Acad. Sci. U. S. A.* <https://doi.org/10.1073/pnas.2004978117>
- 533 Geng, D. (Christina), Innes, J., Wu, W., Wang, G., 2021. Impacts of COVID-19 pandemic on urban  
534 park visitation: a global analysis. *J. For. Res.* 32; 553–567. [https://doi.org/10.1007/s11676-020-](https://doi.org/10.1007/s11676-020-01249-w)  
535 [01249-w](https://doi.org/10.1007/s11676-020-01249-w)
- 536 Google, 2020. Google COVID-19 Community Mobility Reports.  
537 <https://www.google.com/covid19/mobility/> Accessed <18 May 2020>.
- 538 Hamer, M., Kivimäki, M., Gale, C.R., Batty, G.D., 2020. Lifestyle risk factors, inflammatory  
539 mechanisms, and COVID-19 hospitalization: A community-based cohort study of 387,109  
540 adults in UK. *Brain. Behav. Immun.* <https://doi.org/10.1016/j.bbi.2020.05.059>
- 541 Johnson, T.F., Isaac, N.J.B., Paviolo, A., González-Suárez, M., 2021. Handling missing values in  
542 trait data. *Glob. Ecol. Biogeogr.* <https://doi.org/10.1111/geb.13185>
- 543 Jordan, R.E., Adab, P., Cheng, K.K., 2020. Covid-19: Risk factors for severe disease and death.

- 544 BMJ. <https://doi.org/10.1136/bmj.m1198>
- 545 Kraemer, M.U.G., Golding, N., Bisanzio, D., Bhatt, S., Pigott, D.M., Ray, S.E., Brady, O.J.,  
546 Brownstein, J.S., Faria, N.R., Cummings, D.A.T., Pybus, O.G., Smith, D.L., Tatem, A.J., Hay,  
547 S.I., Reiner, R.C., 2019. Utilizing general human movement models to predict the spread of  
548 emerging infectious diseases in resource poor settings. *Sci. Rep.*  
549 <https://doi.org/10.1038/s41598-019-41192-3>
- 550 Kraemer, M.U.G., Yang, C.H., Gutierrez, B., Wu, C.H., Klein, B., Pigott, D.M., du Plessis, L., Faria,  
551 N.R., Li, R., Hanage, W.P., Brownstein, J.S., Layan, M., Vespignani, A., Tian, H., Dye, C.,  
552 Pybus, O.G., Scarpino, S. V., 2020. The effect of human mobility and control measures on the  
553 COVID-19 epidemic in China. *Science* (80-. ). <https://doi.org/10.1126/science.abb4218>
- 554 Lau, H., Khosrawipour, V., Kocbach, P., Mikolajczyk, A., Schubert, J., Bania, J., Khosrawipour, T.,  
555 2020. The positive impact of lockdown in Wuhan on containing the COVID-19 outbreak in  
556 China. *J. Travel Med.* <https://doi.org/10.1093/jtm/taaa037>
- 557 Little, R.J. a, Rubin, D.B., 2002. *Statistical Analysis with Missing Data*, Statistical analysis with  
558 missing data Second edition. John Wiley & Sons. <https://doi.org/10.2307/1533221>
- 559 Maas, J., Verheij, R.A., Groenewegen, P.P., De Vries, S., Spreeuwenberg, P., 2006. Green space,  
560 urbanity, and health: How strong is the relation? *J. Epidemiol. Community Health.*  
561 <https://doi.org/10.1136/jech.2005.043125>
- 562 Mahase, E., 2020. China coronavirus: WHO declares international emergency as death toll exceeds  
563 200. *BMJ.* <https://doi.org/10.1136/bmj.m408>
- 564 Mccallum, H., Dobson, A., 2002. Disease , habitat fragmentation and conservation. *Proc. Biol. Sci.*
- 565 Ministry of Housing Communities & Local Government, 2019. English indices of deprivation 2019  
566 [WWW Document]. URL [https://www.gov.uk/government/statistics/english-indices-of-](https://www.gov.uk/government/statistics/english-indices-of-deprivation-2019)  
567 [deprivation-2019](https://www.gov.uk/government/statistics/english-indices-of-deprivation-2019)
- 568 Mitchell, R., Popham, F., 2007. Greenspace, urbanity and health: Relationships in England. *J.*  
569 *Epidemiol. Community Health.* <https://doi.org/10.1136/jech.2006.053553>

- 570 Nutsford, D., Pearson, A.L., Kingham, S., 2013. An ecological study investigating the association  
571 between access to urban green space and mental health. *Public Health*.  
572 <https://doi.org/10.1016/j.puhe.2013.08.016>
- 573 Office for National Statistics, 2021a. Local authority ageing statistics, based on annual mid-year  
574 population estimates [WWW Document]. URL [https://www.ons.gov.uk/datasets/ageing-](https://www.ons.gov.uk/datasets/ageing-population-estimates/editions/time-series/versions/3)  
575 [population-estimates/editions/time-series/versions/3](https://www.ons.gov.uk/datasets/ageing-population-estimates/editions/time-series/versions/3)
- 576 Office for National Statistics, 2021b. Population estimates for the UK, England and Wales, Scotland  
577 and Northern Ireland, provisional: mid-2019.
- 578 Office for National Statistics, 2021c. Access to gardens and public green space in Great Britain  
579 [WWW Document]. URL  
580 [https://www.ons.gov.uk/economy/environmentalaccounts/datasets/accesstogardensandpublicg](https://www.ons.gov.uk/economy/environmentalaccounts/datasets/accesstogardensandpublicgreenspaceingreatbritain)  
581 [reenspaceingreatbritain](https://www.ons.gov.uk/economy/environmentalaccounts/datasets/accesstogardensandpublicgreenspaceingreatbritain)
- 582 R Development Core Team, 2020. R Development Core Team, R: a language and environment for  
583 statistical computing. *R A Lang. Environ. Estat. Comput.*
- 584 Richardson, S., Hirsch, J.S., Narasimhan, M., Crawford, J.M., McGinn, T., Davidson, K.W.,  
585 Barnaby, D.P., Becker, L.B., Chelico, J.D., Cohen, S.L., Cookingham, J., Coppa, K.,  
586 Diefenbach, M.A., Dominello, A.J., Duer-Hefele, J., Falzon, L., Gitlin, J., Hajizadeh, N., Harvin,  
587 T.G., Hirschwerk, D.A., Kim, E.J., Kozel, Z.M., Marrast, L.M., Mogavero, J.N., Osorio, G.A.,  
588 Qiu, M., Zanos, T.P., 2020. Presenting Characteristics, Comorbidities, and Outcomes among  
589 5700 Patients Hospitalized with COVID-19 in the New York City Area. *JAMA - J. Am. Med.*  
590 *Assoc.* <https://doi.org/10.1001/jama.2020.6775>
- 591 Rowland, C.S., Morton, R.D., Carrasco, L., McShane, G., O'Neil, A.W., Wood, C., 2017. Land  
592 Cover Map 2015. *NERC Environ. Inf. Data Cent.*
- 593 Seo, S., Choi, S., Kim, K., Kim, S.M., Park, S.M., 2019. Association between urban green space  
594 and the risk of cardiovascular disease: A longitudinal study in seven Korean metropolitan  
595 areas. *Environ. Int.* <https://doi.org/10.1016/j.envint.2019.01.038>

- 596 Shoari, N., Ezzati, M., Baumgartner, J., Malacarne, D., Fecht, D., 2020. Accessibility and allocation  
597 of public parks and gardens in England and Wales: A COVID-19 social distancing perspective.  
598 PLoS One. <https://doi.org/10.1371/journal.pone.0241102>
- 599 Slater, S.J., Christiana, R.W., Gustat, J., 2020. Recommendations for keeping parks and green  
600 space accessible for mental and physical health during COVID-19 and other pandemics. *Prev.*  
601 *Chronic Dis.* <https://doi.org/10.5888/PCD17.200204>
- 602 Soga, M., Evans, M.J., Tsuchiya, K., Fukano, Y., 2020. A room with a green view: the importance of  
603 nearby nature for mental health during the COVID-19 pandemic. *Ecol. Appl.*  
604 <https://doi.org/10.1002/eap.2248>
- 605 Taylor, L., Hochuli, D.F., 2017. Defining greenspace: Multiple uses across multiple disciplines.  
606 *Landsc. Urban Plan.* <https://doi.org/10.1016/j.landurbplan.2016.09.024>
- 607 UK Government, 2020a. The Health Protection (Coronavirus, Restrictions) (England) (Amendment)  
608 (No. 4) Regulations 2020, [legislation.gov.uk](https://www.legislation.gov.uk).
- 609 UK Government, 2020b. UK gridded population 2011 based on Census 2011 and Land Cover Map  
610 2015.
- 611 UK Government, 2020c. Unemployment by ethnicity.
- 612 UK Government, 2018. Unemployment by ethnicity: Unemployment by local authority [WWW  
613 Document]. URL [https://data.gov.uk/dataset/fe6c83aa-62aa-4a8c-94cc-  
614 225f47287225/unemployment-by-ethnicity/datafile/eba34752-0512-4cbe-9941-  
615 c9e5745fa937/preview](https://data.gov.uk/dataset/fe6c83aa-62aa-4a8c-94cc-225f47287225/unemployment-by-ethnicity/datafile/eba34752-0512-4cbe-9941-c9e5745fa937/preview)
- 616 Van Buuren, S., Groothuis-Oudshoorn, K., 2011. MICE: Multivariate Imputation by Chained  
617 Equations in R. *J. Stat. Softw.* 10; 1 – 68. <https://doi.org/10.1177/0962280206074463>
- 618 van den Berg, M., Wendel-Vos, W., van Poppel, M., Kemper, H., van Mechelen, W., Maas, J., 2015.  
619 Health benefits of green spaces in the living environment: A systematic review of  
620 epidemiological studies. *Urban For. Urban Green.* <https://doi.org/10.1016/j.ufug.2015.07.008>

- 621 Venter, Z.S., Barton, D.N., Gundersen, V., Figari, H., Nowell, M., 2020. Urban nature in a time of  
622 crisis: Recreational use of green space increases during the COVID-19 outbreak in Oslo,  
623 Norway. *Environ. Res. Lett.* <https://doi.org/10.1088/1748-9326/abb396>
- 624 Williamson, E.J., Walker, A.J., Bhaskaran, K., Bacon, S., Bates, C., Morton, C.E., Curtis, H.J.,  
625 Mehrkar, A., Evans, D., Inglesby, P., Cockburn, J., McDonald, H.I., MacKenna, B., Tomlinson,  
626 L., Douglas, I.J., Rentsch, C.T., Mathur, R., Wong, A.Y.S., Grieve, R., Harrison, D., Forbes, H.,  
627 Schultze, A., Croker, R., Parry, J., Hester, F., Harper, S., Perera, R., Evans, S.J.W., Smeeth,  
628 L., Goldacre, B., 2020. Factors associated with COVID-19-related death using OpenSAFELY.  
629 *Nature.* <https://doi.org/10.1038/s41586-020-2521-4>
- 630 Wood, S., 2021. *mgcv* 1.8-34.
- 631 Zhang, N., Huang, H., Su, B., Ma, X., Li, Y., 2018. A human behavior integrated hierarchical model  
632 of airborne disease transmission in a large city. *Build. Environ.*  
633 <https://doi.org/10.1016/j.buildenv.2017.11.011>
- 634
- 635
- 636
