# 1 **Associations between COVID-19 transmission rates,** 2 **park use, and landscape structure**

3 Thomas F. Johnson<sup>1</sup>, Lisbeth A. Hordley<sup>1</sup>, Matthew P. Greenwell<sup>1</sup>, Luke C. Evans<sup>1</sup>

4 1: Ecology and Evolutionary Biology, School of Biological Sciences, University of Reading, Reading, UK

5 Corresponding author: Thomas Frederick Johnson ([Thomas.frederick.johnson@outlook.com](mailto:Thomas.frederick.johnson@outlook.com))

## 6 **Abstract**

7 The COVID-19 pandemic has had severe impacts on global public health. In England, social  
8 distancing measures and a nationwide lockdown were introduced to reduce the spread of the virus.  
9 Green space accessibility may have been particularly important during this lockdown, as it could  
10 have provided benefits for physical and mental wellbeing. However, the associations between public  
11 green space use and the rate of COVID-19 transmission are yet to be quantified, and as the size  
12 and accessibility of green spaces vary within England's local authorities, the risks and benefits to  
13 the public of using green space may be context-dependent. To evaluate how green space affected  
14 COVID-19 transmission across 299 local authorities (small regions) in England, we calculated a  
15 daily case rate metric, based upon a seven-day moving average, for each day within the period  
16 June 1<sup>st</sup> - November 30<sup>th</sup> 2020 and assessed how baseline health and mobility variables influenced  
17 these rates. Next, looking at the residual case rates, we investigated how landscape structure (e.g.  
18 area and patchiness of green space) and park use influenced transmission. We first show that  
19 reducing mobility is associated with a decline in case rates, especially in areas with high population  
20 clustering. After accounting for known mechanisms behind transmission rates, we found that park  
21 use (showing a preference for park mobility) was associated with decreased residual case rates,  
22 especially when green space was low and contiguous (not patchy). Our results support that a  
23 reduction in overall mobility may be a good strategy for reducing case rates, endorsing the success  
24 of lockdown measures. However, if mobility is necessary, outdoor park use may be safer than other  
25 forms of mobility and associated activities (e.g. shopping or office-based working).

26

27 **Keywords**

28 COVID; coronavirus; ecosystem services; fragmentation; green space; health; park use; public  
29 health

30 **1. Introduction**

31 The COVID-19 pandemic has had severe impacts on public health (Mahase, 2020) and remains an  
32 emergency of international concern. In response to the pandemic, the UK government implemented  
33 social distancing measures and nationwide lockdowns to control the spread of the virus (UK  
34 Government, 2020a). During these periods, the general public were limited in the distances they  
35 could travel and, at certain points, the number of times they could leave their residence each day;  
36 with an allowance of one non-essential trip during the peak of transmission (UK Government,  
37 2020a). Though social restrictions have fluctuated in response to case rates, social distancing has  
38 been constant and there has been a general message of reduced movement and staying local  
39 where possible for much of 2020 and throughout 2021. These restrictions have meant that  
40 members of the public became more reliant on amenity spaces close to their residences for daily  
41 exercise and/or recreation (Geng et al., 2021). Green spaces may provide a comparatively safe  
42 place for these activities, though the amount and structure of green space available for public use  
43 differs widely across the UK. Here we evaluate if differences in the availability and structure of  
44 public green space within local authorities (local government bodies responsible for public services  
45 within a specified area) in England, and their usage, influenced the local rate of incidence of  
46 COVID-19.

47 Green spaces, which we define as vegetated non-arable areas - see Taylor & Hochuli (2017) for  
48 further details - provide important cultural and recreational ecosystem services, benefiting both  
49 mental and physical health (Beyer et al., 2014; Cohen-Cline et al., 2015). These benefits are usually  
50 considered in terms of reducing the prevalence or severity of conditions such as mental stress  
51 (Nutsford et al., 2013) or cardiovascular disease (Seo et al., 2019), and some of these benefits have  
52 continued throughout the pandemic (Slater et al., 2020; Soga et al., 2020). However, the influence  
53 of green space use on disease transmission rates has received less investigation, but is of great

54 importance as green space use has increased rapidly during the pandemic (Venter et al., 2020).  
55 Furthermore, it is unclear how 'safe' green spaces are during periods of higher incidence especially  
56 in densely populated areas (Shoari et al., 2020).

57 We anticipate that green space could impact COVID-19 incidence in two ways: general health and  
58 wellbeing, and transmission. It is conceivable that general health and well-being is greater in areas  
59 with more green space, as higher levels of green space are associated with healthier populations  
60 (Maas et al., 2006; Mitchell and Popham, 2007; van den Berg et al., 2015). As COVID-19 has a  
61 greater impact on those with underlying health conditions and sedentary lifestyles (Hamer et al.,  
62 2020; Jordan et al., 2020), green space may, therefore, indirectly provide some level of resilience to  
63 the disease and/or reduce incidence. However, our key focus here is on transmission, as it is likely  
64 that the major benefits of outdoor recreation in green space are related to a lower risk of infection.  
65 Current evidence suggests that COVID-19 is spread via droplet infections, contact with  
66 contaminated individuals or surfaces, and through aerosol transmission (Bahl et al., 2020). These  
67 risks are likely minimised in green space areas, as generally, they are less spatially confined, and  
68 contain fewer surfaces prone to frequent touching or contact. Consequently, green space use may  
69 represent a safe form of recreation by minimising risk of infection.

70 In England approximately 87% of the population are within a 10-minute walk of public parks and  
71 gardens (Shoari *et al.* 2020). However, both the structure and amount of green space vary between  
72 local authorities, and both could influence COVID-19 incidence. Generally, it has been found that  
73 greater health benefits are derived from larger areas of green space (Ekkel and de Vries, 2017). In  
74 the context of disease transmission, larger areas may offer more space per individual, lowering  
75 transmission risk. However, smaller fragmented areas of green space are common in many  
76 residential areas and are, therefore, more accessible to much of the population and may be used  
77 more frequently. Further, if public use is distributed across fragmented green spaces, the wider  
78 effects of a transmission incident could be reduced, as contacts would be isolated to the members  
79 of a neighbourhood or community adjacent to a particular green space. This process can be seen in  
80 animal diseases where habitat fragmentation reduces transmission due to limiting interactions  
81 between groups in different patches (Mccallum and Dobson, 2002). However, fragmentation also

82 typically results from reductions in the total area of green space (Fahrig, 2013), leading to less  
83 overall space per individual, possibly increasing transmission rates.

84 Whilst the effects of green space on COVID-19 transmission are currently unclear, other  
85 environmental and social factors are known to influence both the spread and severity of the  
86 disease. For example, human mobility drives the spread of infectious diseases (Kraemer et al.,  
87 2019) and studies have shown that reducing social interactions by restricting mobility can lead to a  
88 decrease in transmission rates of COVID-19 (Chinazzi et al., 2020; Gatto et al., 2020). Furthermore,  
89 as diseases are often spread along transport links and in offices (Gatto et al., 2020; Zhang et al.,  
90 2018), enforcing lockdown situations that curtail movement, such as requiring people to work from  
91 home, can have a great effect on reducing transmission rates. In addition to mobility, health and  
92 social factors have been associated with increased severity of the disease such as age, underlying  
93 health conditions, and deprivation (Richardson et al., 2020; Williamson et al., 2020). Consequently,  
94 any possible effects of green space must be considered after attempting to account for factors that  
95 could increase recorded incidence.

96 Given the stated benefits of green space, it is important to attempt to evaluate using the available  
97 evidence, the impact of green space use on transmission rates. In addition, understanding the  
98 influence of green space on COVID-19 incidence could provide an estimate of the value of green  
99 space for maintaining public health if subjected to a resurgence of the COVID-19 pandemic. And, in  
100 the longer term, indicate the potential benefits of local green space on future pandemics of  
101 comparative severity. Here, using time series of COVID-19 cases within local authorities in England,  
102 we explore how both green space use and access (i.e. availability of green spaces) influence  
103 COVID-19 incidence. Our approach is to first construct a baseline transmission model to attempt to  
104 control for factors likely to influence recorded COVID-19 incidence and then to explore how green  
105 space influenced case rates above or below this baseline. We predict that green space and the way  
106 it is structured will, in itself, have no effect on case rates. However, we expect that an increase in  
107 relative park use (i.e. spending time in green space over indoor activities) will make the structure  
108 and availability of green space important (Figure 1). Specifically, when green space is low, park use  
109 will likely represent a safer form of movement (e.g. compared to shopping), unless the green space

110 becomes a congregation zone that inflates transmission risk. Furthermore, we predict that case  
111 rates will be lower when green space is fragmented, as the disease will be contained in more  
112 localised areas. For example, if the local authority has one large park the presence of an infected  
113 individual puts more people at risk than an infected individual attending one of many parks. Further,  
114 we predict, as others have found (Kraemer et al., 2020), that increased mobility will increase  
115 incidence, but that park use (measured as relative use of parks) is a relatively safe form of mobility  
116 (e.g. preferable over shopping).

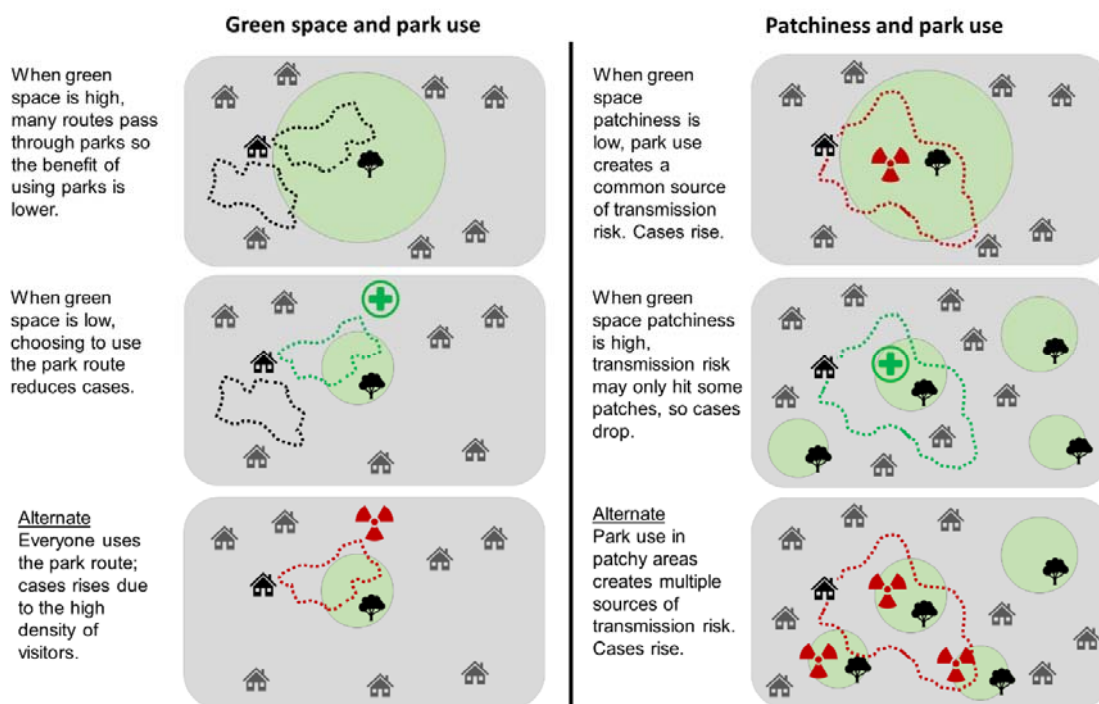

117

118 **Figure 1.** Mechanisms by which green space and patchiness could interact with park use to influence  
119 COVID-19 transmission. The upper two rows describe the primary predictions, whilst the bottom row explains  
120 alternate predictions. All variables (e.g. population density) except green space and patchiness, respectively,  
121 are held at a constant in these predictions. Green circles with a tree icon indicate the presence of green  
122 space. Dotted lines indicate walking routes, which becomes park use when the line overlaps a green space.  
123 The green health symbol indicates that the landscape metric and park use is beneficial, whilst the red toxic  
124 symbol indicates a risk.

## 125 2. Methods

### 126 2.1 Data compilation

#### 127 2.1.1 COVID-19 case rates

128 We compiled daily lab-confirmed cases (incidence) of COVID-19 in England from February 15<sup>th</sup>  
129 2020 up to November 30<sup>th</sup> 2020 (available from <https://coronavirus.data.gov.uk/>). We only included  
130 cases until November, as in December England began an aggressive vaccination campaign and the  
131 more infectious COVID B1.1.7 variant began to spread widely (Horby et al., 2021) – factors that  
132 could confound our models (see below). Cases were recorded at the lower tier local authority  
133 (administrative areas for local government) level (N = 299). These local authorities vary in size (3 –  
134 26,000km<sup>2</sup>), demographics, cultures, and in socio-economic circumstances. Incidence over this time  
135 was highly variable with periods of rapid increases, which were then relatively controlled by periods  
136 of national lockdown (Figure 2). To determine factors influencing COVID-19 transmission, we  
137 estimated case rates for each day in each local authority. Case rates were derived by fitting log-  
138 linear models, regressing the natural log of daily cases against date (days). To reduce the effect of  
139 daily variation in reported cases and instead capture the general trend, we fit these regressions over  
140 7-day moving windows (Figure S1) e.g. to estimate the case rate on August 4<sup>th</sup>, a regression was fit  
141 between cases from August 1<sup>st</sup> – 7<sup>th</sup>, for August 5<sup>th</sup> a regression was fit between August 2<sup>nd</sup> – 8<sup>th</sup>.  
142 The coefficients of these models provided a daily case rate. We converted these coefficients into a  
143 daily percentage change in cases. We opted to calculate case rates instead of using raw daily case  
144 numbers, as case rates more adequately capture transmissibility i.e. regardless of whether cases  
145 jumped from 5 to 10, or 50 to 100, the case rates would capture the doubling effect. Furthermore,  
146 case rates are more robust to variation in the population size of a local authority.

147

148

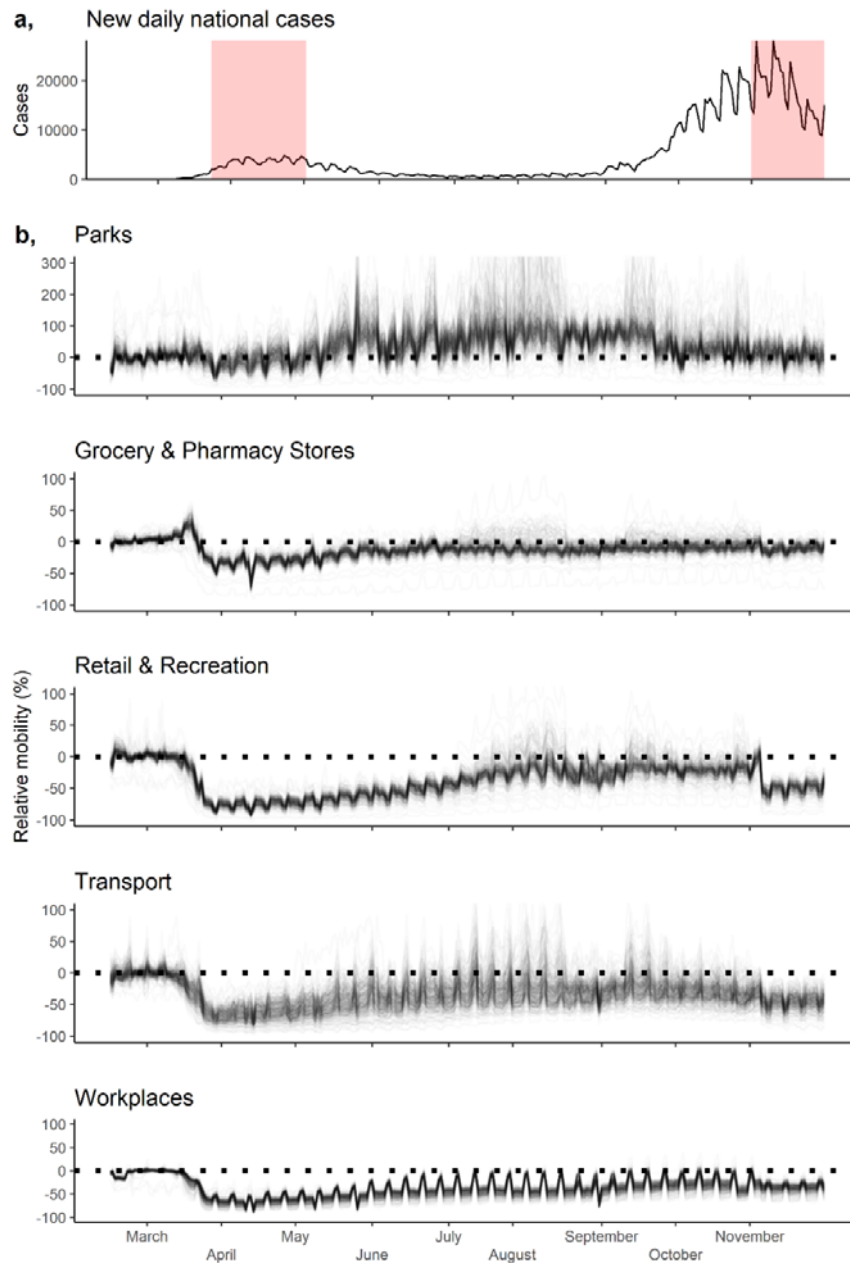

149

150 **Figure 2.** a) Daily lab-confirmed cases across England, with lockdown periods (with restricted mobility)  
151 indicated with red shading. b) Google mobility trends (Google, 2020), describing change in mobility over time  
152 for five different categories, relative to a baseline period (January 3<sup>rd</sup> to February 6<sup>th</sup> 2020). We excluded the  
153 sixth category 'residential mobility' as it is measured differently to all other categories (Google, 2020). Each  
154 line within the mobility trends represents a local authority. All plots extend from February 15<sup>th</sup> to November  
155 30<sup>th</sup> 2020. For the 'parks' plot, we limited the y-axis at 300% to exclude a small number of extreme  
156 observations with high park use.

157

158 *2.1.2 Baseline transmission variables*

159 We compiled variables which describe the mechanisms considered to influence case rates (Table  
160 1). Firstly, we derived two variables which describe the structure of the local authority population:  
161 population density – residential population density (controls for green space in the green  
162 transmission model below); and population clustering – Moran’s I spatial autocorrelation of  
163 residential population density (controls for patchiness in the green transmission model below).  
164 Secondly, we compiled three variables which characterise the human population in each local-  
165 authority prior to COVID-19: health – risk of premature death or a reduction in quality of life due to  
166 poor mental or physical health (Ministry of Housing Communities & Local Government, 2019);  
167 demography - the percentage of the population over 70 (Office for National Statistics, 2021a);  
168 economy – the percentage of unemployed-individuals in the non-retired local authority population  
169 (UK Government, 2018). A high baseline health, whereby few individuals have pre-existing  
170 underlying health conditions, may decrease the chances of an individual presenting with severe  
171 symptoms of COVID-19 and further passing the virus to others (Clark et al., 2020). Accounting for  
172 this baseline health may also assist in controlling for the presence of asymptomatic undetected  
173 infections in case rates.

174



175 **Table 1.** Description of variables within the baseline and green transmission models, including the  
 176 scale at which the variable is measured, where ‘Static’ indicates only one value is derived per local  
 177 authority, whilst there are unique values for each case rate in ‘Timeseries’ variables.

| Variable                           | Description                                                                                                                                                                                                                                                                                                                                                                                                                                                                                                                                                         | Scale      |
|------------------------------------|---------------------------------------------------------------------------------------------------------------------------------------------------------------------------------------------------------------------------------------------------------------------------------------------------------------------------------------------------------------------------------------------------------------------------------------------------------------------------------------------------------------------------------------------------------------------|------------|
| <i>Baseline transmission model</i> |                                                                                                                                                                                                                                                                                                                                                                                                                                                                                                                                                                     |            |
| Population density                 | Local authority population size in mid-year 2019 divided by local authority area [in sq.km]. Source: Office for National Statistics (2021c)                                                                                                                                                                                                                                                                                                                                                                                                                         | Static     |
| Population clustering              | Moran's I spatial autocorrelation of residential population density in 2011, extracted from the UK's gridded 1km resolution population raster. Source: UK Government (2020b)                                                                                                                                                                                                                                                                                                                                                                                        | Static     |
| Health                             | The health aspect of the multiple deprivation index, describing the risk of premature death or a reduction in quality of life due to poor mental or physical health. Low values indicate greater health deprivation. Source: Ministry of Housing Communities & Local Government (2019)                                                                                                                                                                                                                                                                              | Static     |
| Demography                         | Percentage of local authority population aged over 70 in June 2019. Source: Office for National Statistics (2021b)                                                                                                                                                                                                                                                                                                                                                                                                                                                  | Static     |
| Economy                            | Percentage of local authority population (adult non-retired) unemployed in December 2019. Source: UK Government (2020c)                                                                                                                                                                                                                                                                                                                                                                                                                                             | Static     |
| Mobility change                    | Daily mean overall mobility in each local authority across five of the Google mobility metrics: transport, workplaces, parks, grocery & pharmacy stores, and retail & recreation. Overall mobility averaged over the previous 2 to 12 days before each case rate. Source: Google (2020)                                                                                                                                                                                                                                                                             | Timeseries |
| Community cases                    | Seven-day rolling average in cases within each local authority. Variable also included within the green transmission model. Source: <a href="https://coronavirus.data.gov.uk/">https://coronavirus.data.gov.uk/</a>                                                                                                                                                                                                                                                                                                                                                 | Timeseries |
| <i>Green transmission model</i>    |                                                                                                                                                                                                                                                                                                                                                                                                                                                                                                                                                                     |            |
| Green space                        | Green space per person (m <sup>2</sup> ). Derived by dividing total green space area in each local authority by the local authority's population size. We consider green spaces as any area meeting the following land cover types: broadleaved woodland, coniferous woodland, improved grassland, neutral grassland, calcareous grassland, acid grassland, fen, marsh and swamp, heather, heather grassland, and bog. We excluded agricultural land cover types as these were deemed a largely inaccessible/private land cover area. Source: Rowland et al. (2017) | Static     |
| Patchiness                         | Median frequency of parks within a 1km buffer around local authority houses. Source: Office for National Statistics (2021a)                                                                                                                                                                                                                                                                                                                                                                                                                                         | Static     |
| Park use                           | Contribution of park use to the overall mobility metric, derived by extracting the residuals of a linear model between park mobility (response) and overall mobility (predictor) within each local authority. A positive residual value indicates park use exceeds what we would expect given park and overall mobility trends within the local authority. As with the mobility change variable, park use is averaged over the 2 to 12 days before each case rate. Source: Google (2020)                                                                            | Timeseries |

178

179

180 National lockdowns, and the resulting reduction in people's mobility, were an important tool for  
181 reducing transmission within England during the COVID-19 pandemic. We used Google Community  
182 Mobility Reports to track human mobility and its effect on case rates (Google, 2020). These reports  
183 chart movement trends over time across six categories: retail and recreation, groceries and  
184 pharmacies, transit stations, workplaces, residential, and parks. These trends describe how visitors  
185 to, or time spent in, each of the six categories changed compared to a pre-pandemic 5-week period  
186 (the median value from January 3<sup>rd</sup> to February 6<sup>th</sup> 2020). As the mobility data contained missing  
187 values (c.12%) for some local authorities and dates (Figure S2), we were conscious that these  
188 missing values may lead to statistical inference errors within the models below. As a result, we filled  
189 missing mobility values using *mice: multiple imputation chained equations* R package and '2l.pan'  
190 imputation approach, which is a hierarchical normal model within homogenous within group  
191 variances (Van Buuren and Groothuis-Oudshoorn, 2011). This hierarchical structure allowed us to  
192 model mobility trends accounting for differences in local authorities. We included the following terms  
193 within our imputation model: five Google mobility timeseries (all except residential), as well as a 1-  
194 day lag period for each timeseries, the number of days along the timeseries since February 15<sup>th</sup> with  
195 a cubic polynomial term, an indicator variable to describe whether each day was a weekend or not,  
196 and the timeseries of daily COVID-19 cases within the local authority. We also included terms that  
197 didn't vary through time, including: the latitude and longitude of the local authority, and all local  
198 authority covairates within the baseline and green transmission models below (population density,  
199 population clustering, health, demography, economy, green space, and patchiness). Finally, we also  
200 included some national metrics that could infleunce local mobility, including: a timeseries of daily  
201 COVID-19 cases measured at the national scale, as well as the mean daily temperature and  
202 precipitation within Central England. We ran this model through 10 chains, each with 20 iterations,  
203 and 20 pan iterations. The imputation model converged.

204 Conventionally, as part of a multiple imputation framework, these 10 chains should then be  
205 modelled seperately and coefficient standard errors should be inflated with Rubin's rules (Little and  
206 Rubin, 2002). However, given the small percentage of missing values, and that there are currently  
207 no well defined steps for using Rubin's rules in genralized additive models (see our models below),

208 we instead averaged mobility values across the 10 chains to produce mean estimates of mobility for  
209 each category, day, and local authority i.e. conducting single imputation. We ensured the  
210 imputations produced plausible values (Figure S3). From this mobility dataset, we derived a variable  
211 which described overall mobility change for each date in each local authority, which is the average  
212 mobility change across five of the six categories (excluding residential) for each day in each local  
213 authority. We excluded the residential mobility category as it is inversely correlated with all other  
214 categories and is measured differently (Google, 2020). However, as there is likely a delay between  
215 a mobility reduction and a case rate reduction (Lauer et al., 2020), we lagged the overall mobility  
216 change metric by linking each case rate with the mean mobility change from 2 – 12 days prior. As a  
217 result of this lag, we trimmed the temporal extent of dataset to cover March 1<sup>st</sup> – November 30<sup>th</sup>  
218 2020 (instead of February 15<sup>th</sup> – November 30<sup>th</sup> 2020).

### 219 *2.1.3 Green variables*

220 We compiled two variables which describe the structure of green spaces in each local authority:  
221 patchiness – median frequency of parks within a 1km<sup>2</sup> radius around households in the local  
222 authority (Office for National Statistics, 2021c); green space – available green space per person  
223 (m<sup>2</sup>) within the local authority, derived by dividing the green-cover area by the local authority  
224 population size. Green-cover area was calculated from the UKCEH 2015 25 metre land cover raster  
225 (Rowland et al., 2017) and covered a variety of landscape categories (Table 1). For this green-cover  
226 area calculation, we set a 1km buffer around the local authority, to represent green space access of  
227 households on the local authority border.

228 Using the mobility dataset, we also produced a park use variable, which represents how parks are  
229 used relative to overall mobility. This park use metric is derived by fitting a linear model between  
230 park use and overall mobility within each local authority, and extracting the residual park use, where  
231 positive values represent a preference for using parks over other forms of mobility for a given date  
232 (in the original percentage units). Parks include public gardens, castles, national forests, campsites,  
233 observation points, and national parks, but exclude surrounding countryside in rural areas. As a  
234 result, the Google (2020) definition of parks differs slightly to the landscape categories used in our

235 green space metric but was our best available representation of how green space was used during  
236 the pandemic. As in the overall mobility change metric, park use represents the mean use of parks  
237 in the prior 2 to 12 days.

## 238 2.2 Modelling

239 We developed two core models (Figure 3): baseline transmission – aimed at controlling for the  
240 major mechanisms influencing case rates; and green transmission – impact of landscape structure  
241 and park use on case rates. The baseline and green transmission models are both focussed on  
242 case rates, but we anticipated that any effects of green space on COVID-19 case rates were likely  
243 to be much smaller than variables known to influence disease transmission (e.g. population  
244 density). As a result, we structured our analyses to first account for the presence of these more  
245 influential variables in a baseline transmission model, and then in the green transmission model, we  
246 explored how green areas (the focus of this study) can alter the residuals of these case rates.  
247 Conventionally, it is advised to include all variables within one regression instead of analysing the  
248 residuals separately (Freckleton, 2002). However, variables were highly correlated (e.g. population  
249 density and green space are derived in similar ways), and resulted in multicollinearity issues.  
250 Dealing with the major mechanisms first (e.g. population density) mitigated these multicollinearity  
251 issues.

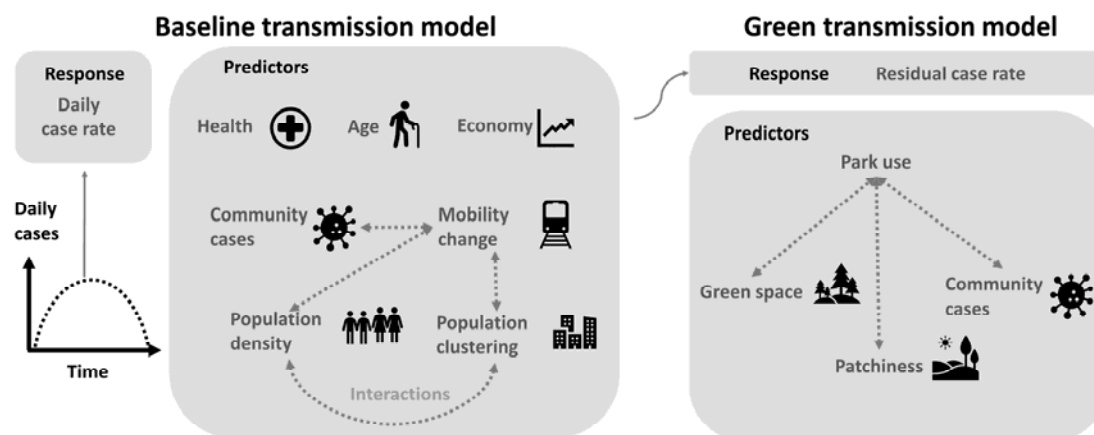

252

253 **Figure 3.** Model structure for baseline transmission and green transmission difference models, depicting the  
254 process for developing the response variables, as well as the predictors used in each model.

255 To control for the baseline health and transmission mechanisms influencing COVID-19 case rates,  
256 we developed a generalized additive model within the *mgcv* R package (Wood, 2021), with case  
257 rate as the response – inverse hyperbolic sine transformed to address heavy tailed residuals. We  
258 included the following parameters as linear predictors: health, demography, economy, population  
259 density ( $\log_{10}$  transformed), population clustering, and mobility change. We also included  
260 interactions between population density and clustering, population density and mobility change, and  
261 population clustering and mobility change. In model development, it was clear that the residuals  
262 were experiencing extreme positive temporal autocorrelation, where case rate values were very  
263 similar to values from the previous day. As a result, we also included the previous days case rate  
264 (one day lag) as a linear predictor in the model. We included random intercept smoothing over the  
265 local authorities to account for the non-independence of multiple case rates within the same local  
266 authorities. Due to working hour restrictions in England, case counts on Saturdays and Sundays  
267 were largely underestimated, and then over-estimated on Mondays and Tuesdays. As a result, we  
268 also included a cyclic smoothing term (with up to 7 knots) over day of the week to capture reporting  
269 biases and control for daily variation (days within a week) in case reporting. We extracted the  
270 residuals from this model for the green transmission model.

271 To assess how landscape structure and park use influenced residual case rates, we again  
272 developed a generalized additive model, with residual case rates from the baseline transmission  
273 models as the response, as well as the following linear predictor parameters: park use, green space  
274 ( $\log_{10}$  transformed), patchiness, as well as interactions between park use and green space, and  
275 park use and patchiness. These models also included random intercept smoothing over local  
276 authorities, but we did not control for the smoothing over days of the week, which was addressed in  
277 the earlier baseline transmission model.

### 278 *2.2.1 Sensitivity analysis*

279 In both the baseline and green transmission models, we were conscious that some parameter  
280 effects may have varied through time. For example, some covariates may have been particularly  
281 influential prior to mandatory mask wearing in shops on July 24<sup>th</sup> 2020. As a result, we extracted the

282 first four weeks of data from our case rate dataset and ran the models on this subset. We then  
283 shifted the data forwards one week and re-ran the models, repeating this procedure (moving  
284 window), creating 40 replicates of the coefficients each representing a different-overlapping period  
285 of time between March 1<sup>st</sup> and November 30<sup>th</sup> 2020. From this, we established that the majority of  
286 coefficients were very stable over time (Figure S4), but mobility change, health, case rate lag, and  
287 park-use were somewhat variable. Looking at how these coefficients change through time, it was  
288 clear that mobility change had a temporal trend, where mobility effects were greatest when cases  
289 were at their highest. As a result, we amended the baseline transmission model to include an  
290 interaction between the mobility variables and the number of cases (averaged over the nearest 7  
291 days) in the local authority at a given moment in time (see Equation S1-2 for the final model  
292 structures). There was no clear temporal trend in the health, case rate lag, and park-use variables  
293 so these remained untouched within the models. We also noted that the magnitude of the mobility  
294 change effect was far greater in the first lockdown period (March – May 2020). We suspect the large  
295 effect is genuine, but given there were spatial biases in case-testing availability during the first  
296 lockdown, we opted to re-model the data with a trimmed temporal extent (June 1<sup>st</sup> to November 30<sup>th</sup>  
297 2020). From this, it was apparent that coefficients were generally far more conservative using the  
298 trimmed dataset, albeit still in the same direction (Figure S5). Given this discrepancy in results  
299 (depending on the temporal extent), we opted to restrict our analyses throughout the rest of this  
300 manuscript to solely focus on the more conservative trimmed temporal extent, which is likely to be  
301 far less effected by spatial variability in case-testing availability – so more robust. As a result, all  
302 model outputs and projections (see below) are derived from the data covering June 1<sup>st</sup> to November  
303 30<sup>th</sup> 2020.

304 In the analyses, we opted to fill missing mobility values with imputation instead of using complete-  
305 case analyses, where any observations with missing mobility data are removed. However, given the  
306 small percentage of missing values, and that the mobility data is averaged across five categories,  
307 and then again through time, we wanted to ensure model coefficients did not change drastically  
308 under imputation, which could be a sign of a statistical inference error (Johnson et al., 2021). As a  
309 result, we repeated the analyses using only complete-case observations and compared model

310 coefficients between the missing value approaches. Given the similarity in the complete-case and  
311 imputation coefficients (Figure S5), we continued using the coefficients from the imputation model  
312 which covered a greater array of local authorities.

313

### 314 *2.2.2 Model checking*

315 We standardised (subtracting values from their mean and dividing by their standard deviation) all  
316 predictor variables in the models to determine effect sizes and reduce multicollinearity where  
317 interactions are present. All model assumptions passed e.g. multicollinearity (variance inflation  
318 factors less than 3 within both the baseline and green transmission model), concavity (observed  
319 and estimated concavity less than 0.1), absence of spatial (Moran's I = 0.1) and temporal  
320 autocorrelation (Figure S6), homogeneity of variance, and normality of residuals. When  
321 summarising results, we report the mean  $\pm$  standard deviation, and when describing model outputs  
322 we report the standardised slope coefficient and 95% confidence intervals. We also report the  $R^2$  for  
323 each model. All analyses were conducted in R 4.0.3 (R Development Core Team, 2020).

### 324 *2.2.3 Projecting cases*

325 To understand how mobility patterns have influenced cases, we projected cases using the baseline  
326 and green transmission models under three scenarios: 1) cases under observed mobility patterns;  
327 2) cases after a 20% reduction in each day's overall mobility; 3) cases after a 20% increase in each  
328 day's park use. We ran the baseline and green transmission models through each of the scenarios  
329 for every local authority between March 1<sup>st</sup> and November 30<sup>th</sup> 2020. We standardised all authorities  
330 so they had the same starting number of cases (10), community cases (10), and lagged case rate  
331 (0.58%; the mean case rate across local authorities on February 28<sup>th</sup>). These cases, community  
332 cases, and lagged case rate were updated and iteratively informed by the new model predictions,  
333 instead of the observed data. As a result, the projected case rates are solely influenced by the  
334 landscape structure and mobility patterns in the local authority. We constrained the case rates so  
335 they could not exceed the range of the observed case rates (-40% to 70%). We converted the  
336 projected case rates into projected cases, against the starting case value of 10.



337 **3. Results**

338 Across the 299 local authorities, case rates fluctuated substantially through time (Figure 4a).

339 Mobility declined substantially during the first national lockdown in March to May, and in the run up

340 to winter (Figure 4b). During the summer months, mobility and the variance in mobility increased,

341 and in some local authorities these increases were close to 100% (doubling mobility). In contrast,

342 park use increased during the first lockdown and remained high (approximately 25% above

343 baseline) until winter approached in October (Figure 4c). There was less variation in park use trends

344 between local authorities than in the mobility change metric.

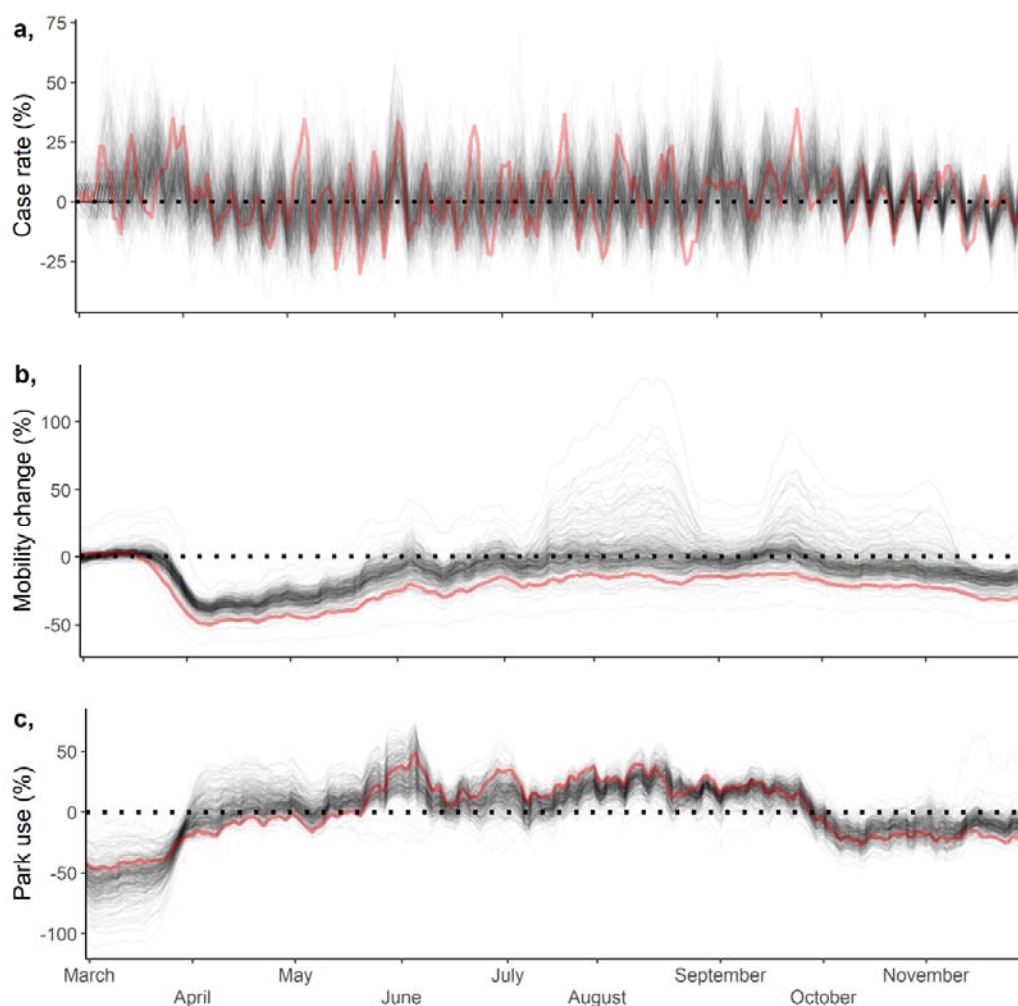

345

346 **Figure 4.** a) Temporal patterns in case rates (a), mobility change (b) and park use (c) between March 1<sup>st</sup> and  
347 November 30<sup>th</sup> 2020, with each line representing a different local authority. The red line represents the Oxford  
348 local authority and acts purely as an example. Case rates are defined as the daily percentage change in  
349 cases calculated over a seven day moving average. Mobility change is the mean daily percentage change



350 over five mobility types (Park, Grocery and Pharmacy stores, Retail and recreation, Transport, and  
351 Workplaces) extracted from Google community mobility reports (Google, 2020). Park use is the relative  
352 contribution of park mobility to overall mobility change, derived by extracting the residuals of a linear model  
353 with park mobility regressed against overall mobility within each local authority i.e. are people visiting parks  
354 more than we would expect on a given date.

### 355 3.1 Baseline transmission models

356 Using the dataset with a trimmed temporal extent of June 1<sup>st</sup> to November 30<sup>th</sup> 2020 (see sensitivity  
357 analysis above), we observed an association between a reduction in mobility and a decline in case  
358 rates, and changes in mobility had a larger impact when there was a higher number of average  
359 cases and when the population was more clustered (Table 2; Figure 5c, d). Population density and  
360 population clustering had no significant impact on case rates. Increases in the health index and  
361 proportion of the population over the age of 70 were both associated with significant decreases in  
362 case rates (Table 2; Figure 5a, b). This baseline transmission model had an  $R^2$  of 0.45.

363

364 **Table 2.** Estimated regression parameters from the baseline and green transmission models with 95%  
 365 confidence intervals. Values rounded to two significant figures, those with confidence intervals not overlapping  
 366 zero (i.e. significant at the  $p = 0.05$  threshold) are shown in bold. These coefficients were derived from models  
 367 utilising the trimmed temporal extent dataset covering June 1<sup>st</sup> to November 30<sup>th</sup> 2020 – see sensitivity  
 368 analysis above.

Coefficient [95% confidence intervals]

| <i>Baseline transmission model</i>       |                                |
|------------------------------------------|--------------------------------|
| Intercept                                | <b>0.38 [0.36, 0.39]</b>       |
| Lag case rate                            | <b>1.55 [1.53, 1.57]</b>       |
| Population density                       | 0.020 [-0.006, 0.050]          |
| Population clustering                    | 0.011 [-0.006, 0.028]          |
| Mobility                                 | <b>0.17 [0.15, 0.19]</b>       |
| Case average                             | <b>0.061 [0.042, 0.080]</b>    |
| Baseline health                          | <b>-0.031 [-0.054, -0.007]</b> |
| Percentage over 70                       | <b>-0.051 [-0.079, -0.023]</b> |
| Percentage unemployed                    | 0.0027 [-0.024, 0.029]         |
| Mobility:Case average                    | <b>0.11 [0.092, 0.13]</b>      |
| Population density:Population clustering | 0.0060 [-0.011, 0.023]         |
| Population density:Mobility              | -0.011 [-0.025, 0.004]         |
| Population clustering:Mobility           | <b>0.029 [0.012, 0.047]</b>    |
| <i>Green transmission model</i>          |                                |
| Intercept                                | 0.0001 [-0.016, 0.016]         |
| Park use                                 | <b>-0.057 [-0.074, -0.041]</b> |
| Green space                              | 0.0035 [-0.018, 0.025]         |
| Patchiness                               | 0.010 [-0.011, 0.032]          |
| Park use:Green space                     | <b>0.032 [0.010, 0.053]</b>    |
| Park use:Patchiness                      | <b>0.024 [0.0026, 0.045]</b>   |

369

370

371

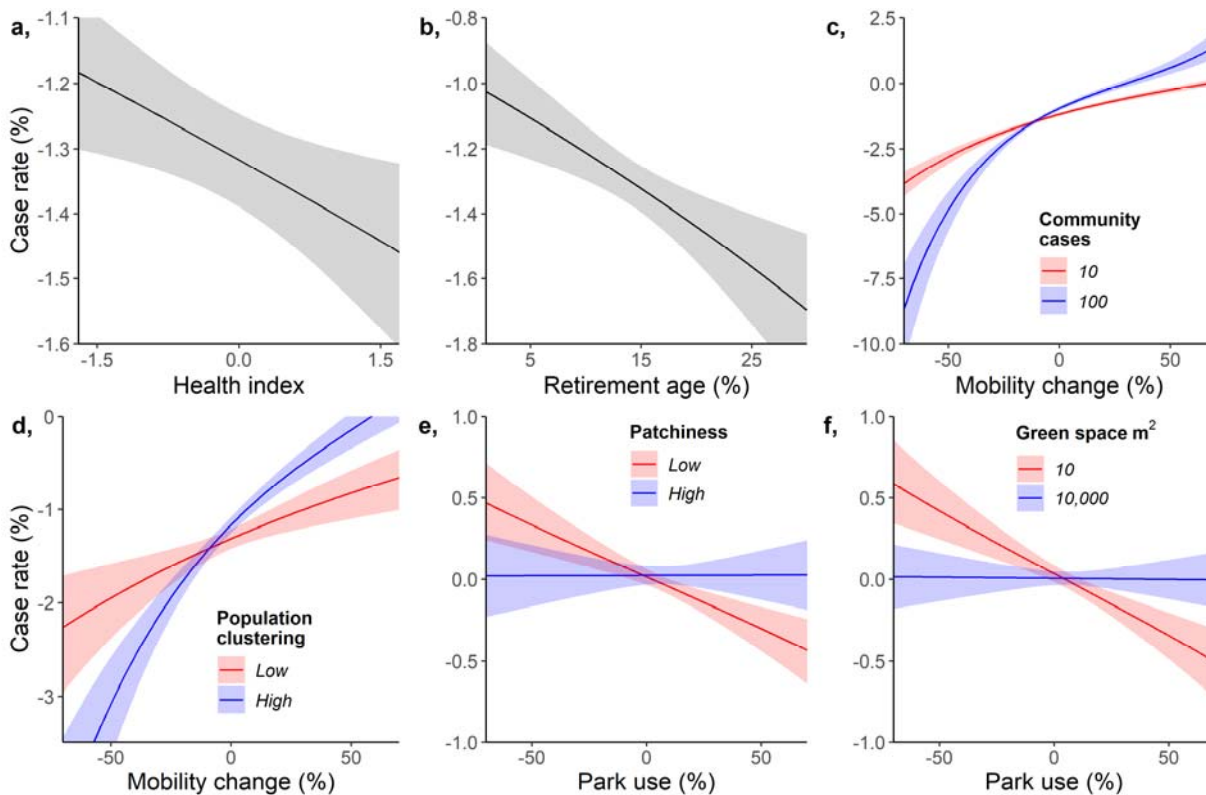

372

373 **Figure 5.** Marginal effects of important interaction parameters in the baseline transmission and in the green  
 374 transmission models. Marginal effects are held at zero for all other parameters as variables were z-  
 375 transformed. Panels depict the effect of: a) health, with low values indicating health deprivation; b) the  
 376 percentage of the population over 70; c) an interaction between mobility and community cases (the 7-day  
 377 average number of cases in the local authority); d) an interaction between mobility and human population  
 378 clustering set at 0.2 (Low) and 0.7 (High), where 0 indicates a random distribution of clustering, and 1  
 379 indicates a complete separation in clustering; e) an interaction between park use and patchiness (the median  
 380 frequency of parks within 1km of each house in a local authority); and f) an interaction between park use and  
 381 green space area per local authority capita. Error bars represent the 95% confidence intervals. These  
 382 marginal effect plots were derived from models utilising the trimmed temporal extent dataset covering June 1<sup>st</sup>  
 383 to November 30<sup>th</sup> 2020 – see sensitivity analysis above

384

### 385 3.2 Green transmission models

386 Park use was associated with decreased residual case rates (Table 2; Figure 5e) but the size of the  
 387 effect depended on the availability of green space and how patchy it was. When patchiness was  
 388 high and when there was a large amount of greenspace, park use had less of an impact on case  
 389 rates, though was still associated with a significant reduction in cases. The green transmission  
 390 model had a small  $R^2$  of 0.01, despite the significant effects.

391 3.3 Projected cases

392 Reducing mobility is a far more effective measure of limiting COVID-19 transmission than increasing  
393 park use (Figure 6). Across local authorities between March 1<sup>st</sup> and November 30<sup>th</sup> 2020, a 20%  
394 reduction in mobility is projected to have led to 51% fewer cases on average (Figure 6b; 95%  
395 quantiles: -88.7% to -29.7%). In contrast, a 20% increase in park use is estimated to have only  
396 reduced cases by 5.4% (Figure 6c; 95% quantiles: -17.3% to 0.6%). So whilst park use is  
397 associated with reducing COVID-19 transmission, the benefits would only be relatively small.  
398 However, there is spatial variation in these findings, with some areas potentially benefitting more  
399 than others from a reduction in mobility or increase in park use (Figure 7).

400

401

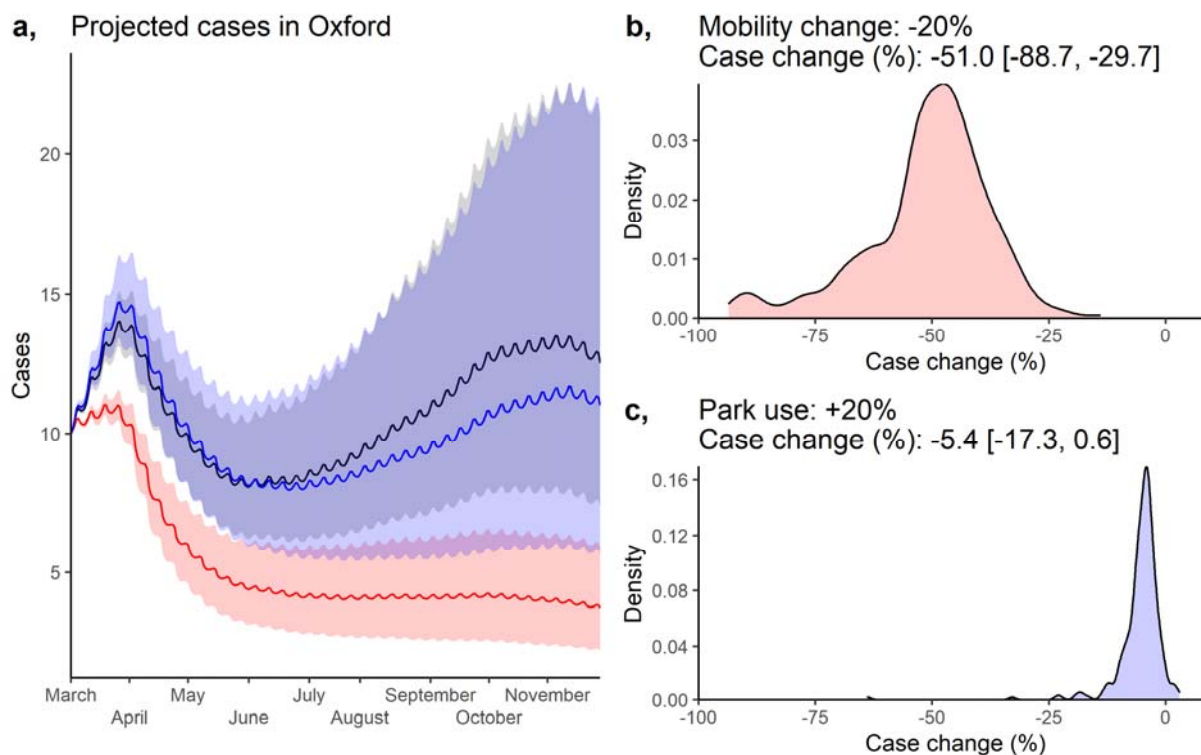

402

403 **Figure 6.** a) Projected daily cases between March 1<sup>st</sup> and November 30<sup>th</sup> 2020 within Oxford under three  
404 scenarios: 1) observed mobility patterns (black); 2) a further 20% reduction in observed mobility (red); and 3)  
405 20% increase in observed park use (blue). In these projections, we set the initial cases (on March 1<sup>st</sup>) at 10,  
406 and with lagged case rate of 0.58% - the mean value across local authorities on February 28<sup>th</sup>. All other  
407 covariates were held at their observed values. Error ribbons represent 95% confidence intervals. Panels b and  
408 c represent the distribution of projected change in cases across local authorities under the 20% mobility  
409 reduction (b) and 20% park use increase (c) scenarios i.e. how much could cases have been reduced under  
410 these scenarios. Case change was derived by dividing the total cases between the March and November  
411 periods under each scenario by the cases in the observed mobility scenario (black), multiplying this value by  
412 100, and then subtracting 100. Whilst these projections cover the period March 1<sup>st</sup> – November 30<sup>th</sup> 2020, the  
413 coefficients used to derive the projections were taken from the trimmed temporal extent dataset of June 1<sup>st</sup> –  
414 November 30<sup>th</sup> 2020, where coefficients were more conservative and less prone to bias (see *sensitivity*  
415 *analyses* above).

416

417

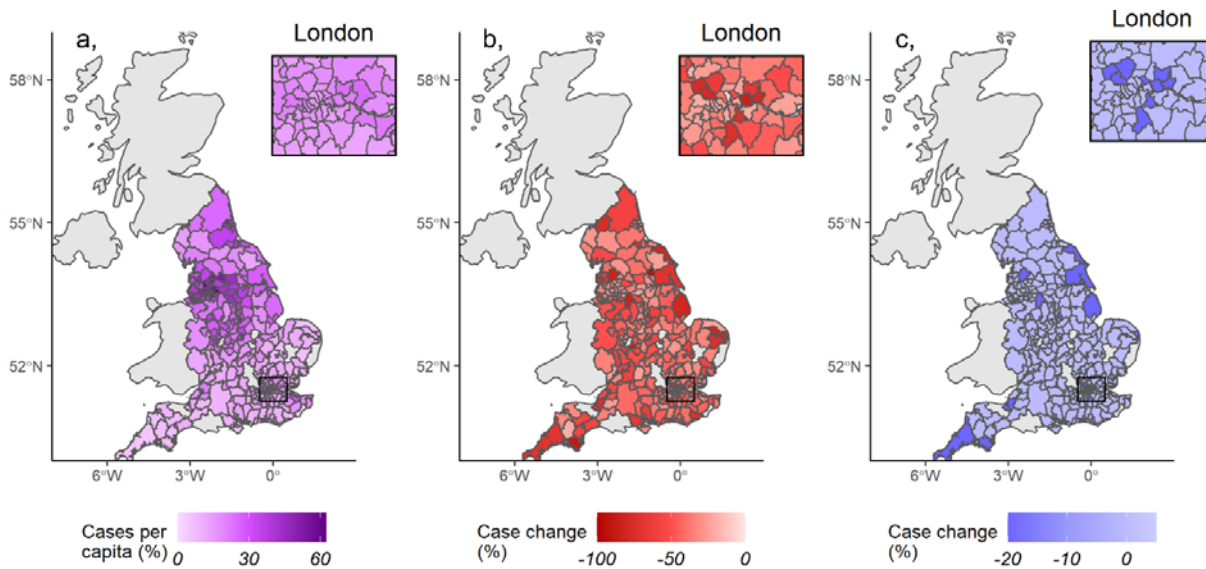

418

419 **Figure 7.** Spatial variation in observed cases per capita (a), and projected case changes under a 20%  
420 mobility reduction (b) and 20% increase in park use (c). Case change was derived by dividing the total cases  
421 between March and November 2020 under each scenario by the cases in the observed mobility projection,  
422 multiplying this value by 100, and then subtracting 100 (see Figure 6). The coefficients used to derive the  
423 projections in b and c were sourced from models utilising the trimmed temporal extent dataset covering June  
424 1<sup>st</sup> to November 30<sup>th</sup> 2020 – see sensitivity analysis above

425

#### 426 4. Discussion

427 In this study, we attempted to quantify the effects of local green space on COVID-19 case rates  
428 after accounting for mechanisms known to influence pandemics in our baseline transmission model.  
429 We found that high overall mobility was associated with increased case rates, especially when  
430 population clustering was high. After accounting for these variables, we found that higher park use,  
431 compared to other amenity areas, was associated with a reduction in case rates, especially in local  
432 authorities with low green space and with contiguous green space. These results suggest that  
433 utilising green spaces rather than carrying out other activities (e.g. visiting shops and workplaces)  
434 may reduce the transmission rate of COVID-19, but these benefits are limited compared to reducing  
435 mobility more generally.

436 From our baseline transmission model results, case rates were lower in local authorities with  
437 healthier populations and older populations (Figure 5a-b). These results are logical, firstly as

438 previous evidence has shown COVID-19 has a greater impact on those with underlying health  
439 conditions (Hamer et al., 2020; Jordan et al., 2020) and more severe cases may be more likely to  
440 be tested and reported. Secondly, whilst the elderly are more at risk of mortality from COVID-19  
441 (Williamson et al., 2020), this fact was widely reported in public health guidance and older people  
442 may have reduced contact with other individuals (Canning et al., 2020). Our baseline transmission  
443 model also shows that reducing mobility is most valuable when community cases are high and in  
444 areas with high population clustering (Figure 5c-d). This is consistent with person-person contact as  
445 the major mechanism of transmission and appears to demonstrate the general effectiveness of  
446 lockdown measures in reducing case rates, as others have demonstrated previously (Davies et al.,  
447 2020; Lau et al., 2020). Mobility had less impact in low clustered areas, which again may be  
448 expected, as people are more likely to be able to maintain distance and the potential number of  
449 interactions is reduced.

450 Once we had accounted for known drivers of case rates, we investigated how landscape structure  
451 and park use (i.e. mobility in green spaces) affected residual case rates using the green  
452 transmission model. Here we found that using parks, relative to other types of mobility, was  
453 associated with a reduction in case rates (Figure 5-6). However, reducing overall mobility (i.e.  
454 mobility to all amenity areas) led to a far more substantial decline in case rates. For example, a 20%  
455 reduction was projected to reduce cases by c.35%, whilst a 20% increase in park use was projected  
456 to reduce cases by 5% to 10% (Figure 6). This suggests that the use of parks may have modestly  
457 helped in reducing transmission rates in some areas during the pandemic, but reducing overall  
458 mobility is substantially more beneficial than maintaining mobility at pre-pandemic levels and  
459 spending that mobility in parks.

460 Whilst park use, overall, had a relatively small effect, we did note stronger effects of park use when  
461 the context of the local area was considered as using parks was beneficial in authorities with low  
462 green space and authorities with contiguous green space (Figure 5e-f and Figure 6). That park use  
463 has a minor beneficial effect overall seems to support our hypothesis that recreation in green space  
464 and parks may be safer than in other amenity areas. This is probably because it is easier to  
465 maintain distance and green spaces have fewer surfaces which could result in transmission if

466 contaminated. However, the limiting impact of this when green space is high and accessible seems  
467 to suggest diminishing returns in how park use can impact COVID-19 transmission. This is perhaps  
468 not surprising if the main value of parks in this context is as an alternative to other relatively more  
469 hazardous amenity areas. Consequently, if there are other safe options outside of public parks then  
470 parks will likely have little impact. However, our findings do suggest that the use of public parks in a  
471 highly urbanised area may be advantageous, though as noted above the strongest effect was from  
472 the reduction of all forms of mobility. Therefore, cautiously, and given that it corresponds with  
473 common sense, we suggest that reducing mobility is a successful strategy for reducing case rates  
474 but given a need for some non-essential time outside of a home, using green spaces such as local  
475 parks may be the next best thing, particularly in highly urbanised areas.

476 A major limitation of the work is the difficulty in comparing across local authorities that vary  
477 simultaneously in many different variables likely important to case rates. This makes inference  
478 about the importance of their individual effects very difficult and so effect sizes should be interpreted  
479 cautiously and with caveat. Another challenge is that pandemics are rare events, consequently, our  
480 analysis covers only a snapshot of time for each local authority. During this period, many different  
481 factors not included in the analysis (e.g. chance super spreading events) may have explained much  
482 of the variation between local authorities. Despite this, the model fits are reasonably high. An  
483 additional limitation in our analyses is the absence of complete Google mobility data in some local  
484 authorities. We handled these missing values with imputation and attempted to ensure models were  
485 robust by comparing imputed models with complete-case models. Encouragingly, our complete-  
486 case and imputed results are very similar, which suggests the imputation has not introduced any  
487 missing data bias (Johnson et al., 2021) – although both the imputation and complete-case analysis  
488 could just be equally wrong. Given this uncertainty, and the further limitations we have identified  
489 above, our mobility findings should be interpreted cautiously.

490 One potential influence we failed to capture within our case rate modelling was the influence of  
491 environmental features like air pollution and weather. Air pollution has already been linked to an  
492 increase in COVID-19 related deaths, and potentially even transmission (Travaglio et al., 2021).  
493 Similarly, there are plausible hypotheses that suggest weather effects like temperature, ultraviolet



494 light, and wind speed may influence the virus's persistence and in-turn transmission (Carlson et al.,  
495 2020). Importantly, both of these environmental features may also interact with the findings in our  
496 study. Firstly, park use may become a more inherently risky activity if air pollution at the green  
497 space is high. Secondly, as park use is likely very correlated with weather, the effects of park use  
498 may be confounded by weather. Both of these points warrant investigation, perhaps at a far finer  
499 scale than the local authority level.

500 Understanding the risks of different amenity areas could be important for longer-term management  
501 of COVID-19 and the landscape-dependency of this advice could be important for developing 'local-  
502 lockdown' guidance. In particular, access to green spaces has been shown to have benefits for  
503 mental and physical well-being (Slater et al., 2020; Soga et al., 2020), and consequently,  
504 understanding the relative risks of using these areas is important. Our results show that COVID-19  
505 case rates may be reduced with individuals spending time in parks, relative to other amenity areas,  
506 especially in urbanised, high-density areas. Although further research is needed, these findings  
507 suggest that the use of parks for recreational activity in these contexts could be advisable,  
508 demonstrating a possible additional utility of these green spaces in addition to the known benefits to  
509 health and wellbeing (de Vries et al., 2003; Mitchell and Popham, 2007; Nutsford et al., 2013) in  
510 normal non-pandemic conditions.

## 511 **Acknowledgments**

512 Thanks to the NERC Covid-19 hackathon for instigating this work. This work was partly funded by  
513 the following NERC (Natural Environment Research Council) Centre for Doctoral Training  
514 studentships: J71566E, P012345, and L002566.

## 515 **Data accessibility**

516 Code and data to repeat analysis are presented in  
517 [https://github.com/GitTFJ/COVID19\\_parks\\_landscape](https://github.com/GitTFJ/COVID19_parks_landscape)

518

519 **Author contributions**

520 All authors contributed to project design. Analysis was led by TFJ and LCE, but all authors  
521 contributed. TFJ and LCE co-wrote the first draft and co-authors contributed to revisions.

522 **References**

523 Bahl, P., Doolan, C., de Silva, C., Chughtai, A.A., Bourouiba, L., MacIntyre, C.R., 2020. Airborne or  
524 Droplet Precautions for Health Workers Treating Coronavirus Disease 2019? *J. Infect. Dis.*

525 <https://doi.org/10.1093/infdis/jiaa189>

526 Beyer, K.M.M., Kaltenbach, A., Szabo, A., Bogar, S., Javier Nieto, F., Malecki, K.M., 2014.

527 Exposure to neighborhood green space and mental health: Evidence from the survey of the  
528 health of wisconsin. *Int. J. Environ. Res. Public Health.*

529 <https://doi.org/10.3390/ijerph110303453>

530 Canning, D., Karra, M., Dayalu, R., Guo, M., Bloom, D.E., 2020. The association between age,  
531 COVID-19 symptoms, and social distancing behavior in the United States. *medRxiv.*

532 <https://doi.org/10.1101/2020.04.19.20065219>

533 Carlson, C.J., Gomez, A.C.R., Bansal, S., Ryan, S.J., 2020. Misconceptions about weather and  
534 seasonality must not misguide COVID-19 response. *Nat. Commun.*

535 <https://doi.org/10.1038/s41467-020-18150-z>

536 Chinazzi, M., Davis, J.T., Ajelli, M., Gioannini, C., Litvinova, M., Merler, S., Pastore y Piontti, A., Mu,

537 K., Rossi, L., Sun, K., Viboud, C., Xiong, X., Yu, H., Elizabeth Halloran, M., Longini, I.M.,

538 Vespignani, A., 2020. The effect of travel restrictions on the spread of the 2019 novel

539 coronavirus (COVID-19) outbreak. *Science (80- )*. <https://doi.org/10.1126/science.aba9757>

540 Clark, A., Jit, M., Warren-Gash, C., Guthrie, B., Wang, H.H.X., Mercer, S.W., Sanderson, C.,

541 McKee, M., Troeger, C., Ong, K.L., Checchi, F., Perel, P., Joseph, S., Gibbs, H.P., Banerjee,

542 A., Eggo, R.M., Nightingale, E.S., O'Reilly, K., Jombart, T., Edmunds, W.J., Rosello, A., Sun,

543 F.Y., Atkins, K.E., Bosse, N.I., Clifford, S., Russell, T.W., Deol, A.K., Liu, Y., Procter, S.R.,

544 Leclerc, Q.J., Medley, G., Knight, G., Munday, J.D., Kucharski, A.J., Pearson, C.A.B., Klepac,

- 545 P., Prem, K., Houben, R.M.G.J., Endo, A., Flasche, S., Davies, N.G., Diamond, C., van  
546 Zandvoort, K., Funk, S., Auzenbergs, M., Rees, E.M., Tully, D.C., Emery, J.C., Quilty, B.J.,  
547 Abbott, S., Villabona-Arenas, C.J., Hué, S., Hellewell, J., Gimma, A., Jarvis, C.I., 2020. Global,  
548 regional, and national estimates of the population at increased risk of severe COVID-19 due to  
549 underlying health conditions in 2020: a modelling study. *Lancet Glob. Heal.*  
550 [https://doi.org/10.1016/S2214-109X\(20\)30264-3](https://doi.org/10.1016/S2214-109X(20)30264-3)
- 551 Cohen-Cline, H., Turkheimer, E., Duncan, G.E., 2015. Access to green space, physical activity and  
552 mental health: A twin study. *J. Epidemiol. Community Health.* [https://doi.org/10.1136/jech-](https://doi.org/10.1136/jech-2014-204667)  
553 [2014-204667](https://doi.org/10.1136/jech-2014-204667)
- 554 Davies, N.G., Kucharski, A.J., Eggo, R.M., Gimma, A., Edmunds, W.J., Jombart, T., O'Reilly, K.,  
555 Endo, A., Hellewell, J., Nightingale, E.S., Quilty, B.J., Jarvis, C.I., Russell, T.W., Klepac, P.,  
556 Bosse, N.I., Funk, S., Abbott, S., Medley, G.F., Gibbs, H., Pearson, C.A.B., Flasche, S., Jit, M.,  
557 Clifford, S., Prem, K., Diamond, C., Emery, J., Deol, A.K., Procter, S.R., van Zandvoort, K.,  
558 Sun, Y.F., Munday, J.D., Rosello, A., Auzenbergs, M., Knight, G., Houben, R.M.G.J., Liu, Y.,  
559 2020. Effects of non-pharmaceutical interventions on COVID-19 cases, deaths, and demand  
560 for hospital services in the UK: a modelling study. *Lancet Public Heal.*  
561 [https://doi.org/10.1016/S2468-2667\(20\)30133-X](https://doi.org/10.1016/S2468-2667(20)30133-X)
- 562 de Vries, S., Verheij, R.A., Groenewegen, P.P., Spreeuwenberg, P., 2003. Natural environments -  
563 Healthy environments? An exploratory analysis of the relationship between greenspace and  
564 health. *Environ. Plan. A.* <https://doi.org/10.1068/a35111>
- 565 Ekkel, E.D., de Vries, S., 2017. Nearby green space and human health: Evaluating accessibility  
566 metrics. *Landsc. Urban Plan.* <https://doi.org/10.1016/j.landurbplan.2016.06.008>
- 567 Fahrig, L., 2013. Rethinking patch size and isolation effects: The habitat amount hypothesis. *J.*  
568 *Biogeogr.* <https://doi.org/10.1111/jbi.12130>
- 569 Freckleton, R.P., 2002. On the misuse of residuals in ecology: Regression of residuals vs. multiple  
570 regression. *J. Anim. Ecol.* <https://doi.org/10.1046/j.1365-2656.2002.00618.x>

- 571 Gatto, M., Bertuzzo, E., Mari, L., Miccoli, S., Carraro, L., Casagrandi, R., Rinaldo, A., 2020. Spread  
572 and dynamics of the COVID-19 epidemic in Italy: Effects of emergency containment measures.  
573 Proc. Natl. Acad. Sci. U. S. A. <https://doi.org/10.1073/pnas.2004978117>
- 574 Geng, D. (Christina), Innes, J., Wu, W., Wang, G., 2021. Impacts of COVID-19 pandemic on urban  
575 park visitation: a global analysis. J. For. Res. 32; 553–567. [https://doi.org/10.1007/s11676-020-](https://doi.org/10.1007/s11676-020-01249-w)  
576 01249-w
- 577 Google, 2020. Google COVID-19 Community Mobility Reports.  
578 <https://www.google.com/covid19/mobility/> Accessed <18 May 2020>.
- 579 Hamer, M., Kivimäki, M., Gale, C.R., Batty, G.D., 2020. Lifestyle risk factors, inflammatory  
580 mechanisms, and COVID-19 hospitalization: A community-based cohort study of 387,109  
581 adults in UK. Brain. Behav. Immun. <https://doi.org/10.1016/j.bbi.2020.05.059>
- 582 Horby, P., Huntley, C., Davies, N., Edmunds, J., Ferguson, N., Medley, G., Semple, C., 2021.  
583 NERVTAG paper on COVID-19 variant of concern B.1.1.7. Gov.uk.
- 584 Johnson, T.F., Isaac, N.J.B., Paviolo, A., González-Suárez, M., 2021. Handling missing values in  
585 trait data. Glob. Ecol. Biogeogr. <https://doi.org/10.1111/geb.13185>
- 586 Jordan, R.E., Adab, P., Cheng, K.K., 2020. Covid-19: Risk factors for severe disease and death.  
587 BMJ. <https://doi.org/10.1136/bmj.m1198>
- 588 Kraemer, M.U.G., Golding, N., Bisanzio, D., Bhatt, S., Pigott, D.M., Ray, S.E., Brady, O.J.,  
589 Brownstein, J.S., Faria, N.R., Cummings, D.A.T., Pybus, O.G., Smith, D.L., Tatem, A.J., Hay,  
590 S.I., Reiner, R.C., 2019. Utilizing general human movement models to predict the spread of  
591 emerging infectious diseases in resource poor settings. Sci. Rep.  
592 <https://doi.org/10.1038/s41598-019-41192-3>
- 593 Kraemer, M.U.G., Yang, C.H., Gutierrez, B., Wu, C.H., Klein, B., Pigott, D.M., du Plessis, L., Faria,  
594 N.R., Li, R., Hanage, W.P., Brownstein, J.S., Layan, M., Vespignani, A., Tian, H., Dye, C.,  
595 Pybus, O.G., Scarpino, S. V., 2020. The effect of human mobility and control measures on the  
596 COVID-19 epidemic in China. Science (80-. ). <https://doi.org/10.1126/science.abb4218>

- 597 Lau, H., Khosrawipour, V., Kocbach, P., Mikolajczyk, A., Schubert, J., Bania, J., Khosrawipour, T.,  
598 2020. The positive impact of lockdown in Wuhan on containing the COVID-19 outbreak in  
599 China. *J. Travel Med.* <https://doi.org/10.1093/jtm/taaa037>
- 600 Lauer, S.A., Grantz, K.H., Bi, Q., Jones, F.K., Zheng, Q., Meredith, H.R., Azman, A.S., Reich, N.G.,  
601 Lessler, J., 2020. The incubation period of coronavirus disease 2019 (CoVID-19) from publicly  
602 reported confirmed cases: Estimation and application. *Ann. Intern. Med.* 172; 577–582.  
603 <https://doi.org/10.7326/M20-0504>
- 604 Little, R.J. a, Rubin, D.B., 2002. *Statistical Analysis with Missing Data*, Statistical analysis with  
605 missing data Second edition. John Wiley & Sons. <https://doi.org/10.2307/1533221>
- 606 Maas, J., Verheij, R.A., Groenewegen, P.P., De Vries, S., Spreeuwenberg, P., 2006. Green space,  
607 urbanity, and health: How strong is the relation? *J. Epidemiol. Community Health.*  
608 <https://doi.org/10.1136/jech.2005.043125>
- 609 Mahase, E., 2020. China coronavirus: WHO declares international emergency as death toll exceeds  
610 200. *BMJ.* <https://doi.org/10.1136/bmj.m408>
- 611 Mccallum, H., Dobson, A., 2002. Disease , habitat fragmentation and conservation. *Proc. Biol. Sci.*
- 612 Ministry of Housing Communities & Local Government, 2019. English indices of deprivation 2019  
613 [WWW Document]. URL [https://www.gov.uk/government/statistics/english-indices-of-](https://www.gov.uk/government/statistics/english-indices-of-deprivation-2019)  
614 [deprivation-2019](https://www.gov.uk/government/statistics/english-indices-of-deprivation-2019)
- 615 Mitchell, R., Popham, F., 2007. Greenspace, urbanity and health: Relationships in England. *J.*  
616 *Epidemiol. Community Health.* <https://doi.org/10.1136/jech.2006.053553>
- 617 Nutsford, D., Pearson, A.L., Kingham, S., 2013. An ecological study investigating the association  
618 between access to urban green space and mental health. *Public Health.*  
619 <https://doi.org/10.1016/j.puhe.2013.08.016>
- 620 Office for National Statistics, 2021a. Local authority ageing statistics, based on annual mid-year  
621 population estimates [WWW Document]. URL [https://www.ons.gov.uk/datasets/ageing-](https://www.ons.gov.uk/datasets/ageing-population-estimates/editions/time-series/versions/3)  
622 [population-estimates/editions/time-series/versions/3](https://www.ons.gov.uk/datasets/ageing-population-estimates/editions/time-series/versions/3)

- 623 Office for National Statistics, 2021b. Population estimates for the UK, England and Wales, Scotland  
624 and Northern Ireland, provisional: mid-2019.
- 625 Office for National Statistics, 2021c. Access to gardens and public green space in Great Britain  
626 [WWW Document]. URL  
627 [https://www.ons.gov.uk/economy/environmentalaccounts/datasets/accesstogardensandpublicg](https://www.ons.gov.uk/economy/environmentalaccounts/datasets/accesstogardensandpublicgreenspaceingreatbritain)  
628 [reenspaceingreatbritain](https://www.ons.gov.uk/economy/environmentalaccounts/datasets/accesstogardensandpublicgreenspaceingreatbritain)
- 629 R Development Core Team, 2020. R Development Core Team, R: a language and environment for  
630 statistical computing. R A Lang. Environ. Estat. Comput.
- 631 Richardson, S., Hirsch, J.S., Narasimhan, M., Crawford, J.M., McGinn, T., Davidson, K.W.,  
632 Barnaby, D.P., Becker, L.B., Chelico, J.D., Cohen, S.L., Cookingham, J., Coppa, K.,  
633 Diefenbach, M.A., Dominello, A.J., Duer-Hefe, J., Falzon, L., Gitlin, J., Hajizadeh, N., Harvin,  
634 T.G., Hirschwerk, D.A., Kim, E.J., Kozel, Z.M., Marrast, L.M., Mogavero, J.N., Osorio, G.A.,  
635 Qiu, M., Zanos, T.P., 2020. Presenting Characteristics, Comorbidities, and Outcomes among  
636 5700 Patients Hospitalized with COVID-19 in the New York City Area. JAMA - J. Am. Med.  
637 Assoc. <https://doi.org/10.1001/jama.2020.6775>
- 638 Rowland, C.S., Morton, R.D., Carrasco, L., McShane, G., O'Neil, A.W., Wood, C., 2017. Land  
639 Cover Map 2015. NERC Environ. Inf. Data Cent.
- 640 Seo, S., Choi, S., Kim, K., Kim, S.M., Park, S.M., 2019. Association between urban green space  
641 and the risk of cardiovascular disease: A longitudinal study in seven Korean metropolitan  
642 areas. Environ. Int. <https://doi.org/10.1016/j.envint.2019.01.038>
- 643 Shoari, N., Ezzati, M., Baumgartner, J., Malacarne, D., Fecht, D., 2020. Accessibility and allocation  
644 of public parks and gardens in England and Wales: A COVID-19 social distancing perspective.  
645 PLoS One. <https://doi.org/10.1371/journal.pone.0241102>
- 646 Slater, S.J., Christiana, R.W., Gustat, J., 2020. Recommendations for keeping parks and green  
647 space accessible for mental and physical health during COVID-19 and other pandemics. Prev.  
648 Chronic Dis. <https://doi.org/10.5888/PCD17.200204>

- 649 Soga, M., Evans, M.J., Tsuchiya, K., Fukano, Y., 2020. A room with a green view: the importance of  
650 nearby nature for mental health during the COVID-19 pandemic. *Ecol. Appl.*  
651 <https://doi.org/10.1002/eap.2248>
- 652 Taylor, L., Hochuli, D.F., 2017. Defining greenspace: Multiple uses across multiple disciplines.  
653 *Landsc. Urban Plan.* <https://doi.org/10.1016/j.landurbplan.2016.09.024>
- 654 Travaglio, M., Yu, Y., Popovic, R., Selley, L., Leal, N.S., Martins, L.M., 2021. Links between air  
655 pollution and COVID-19 in England. *Environ. Pollut.* 268.  
656 <https://doi.org/10.1016/j.envpol.2020.115859>
- 657 UK Government, 2020a. The Health Protection (Coronavirus, Restrictions) (England) (Amendment)  
658 (No. 4) Regulations 2020, [legislation.gov.uk](http://legislation.gov.uk).
- 659 UK Government, 2020b. UK gridded population 2011 based on Census 2011 and Land Cover Map  
660 2015.
- 661 UK Government, 2020c. Unemployment by ethnicity.
- 662 UK Government, 2018. Unemployment by ethnicity: Unemployment by local authority [WWW  
663 Document]. URL [https://data.gov.uk/dataset/fe6c83aa-62aa-4a8c-94cc-](https://data.gov.uk/dataset/fe6c83aa-62aa-4a8c-94cc-225f47287225/unemployment-by-ethnicity/datafile/eba34752-0512-4cbe-9941-c9e5745fa937/preview)  
664 [225f47287225/unemployment-by-ethnicity/datafile/eba34752-0512-4cbe-9941-](https://data.gov.uk/dataset/fe6c83aa-62aa-4a8c-94cc-225f47287225/unemployment-by-ethnicity/datafile/eba34752-0512-4cbe-9941-c9e5745fa937/preview)  
665 [c9e5745fa937/preview](https://data.gov.uk/dataset/fe6c83aa-62aa-4a8c-94cc-225f47287225/unemployment-by-ethnicity/datafile/eba34752-0512-4cbe-9941-c9e5745fa937/preview)
- 666 Van Buuren, S., Groothuis-Oudshoorn, K., 2011. MICE: Multivariate Imputation by Chained  
667 Equations in R. *J. Stat. Softw.* 10; 1 – 68. <https://doi.org/10.1177/0962280206074463>
- 668 van den Berg, M., Wendel-Vos, W., van Poppel, M., Kemper, H., van Mechelen, W., Maas, J., 2015.  
669 Health benefits of green spaces in the living environment: A systematic review of  
670 epidemiological studies. *Urban For. Urban Green.* <https://doi.org/10.1016/j.ufug.2015.07.008>
- 671 Venter, Z.S., Barton, D.N., Gundersen, V., Figari, H., Nowell, M., 2020. Urban nature in a time of  
672 crisis: Recreational use of green space increases during the COVID-19 outbreak in Oslo,  
673 Norway. *Environ. Res. Lett.* <https://doi.org/10.1088/1748-9326/abb396>

674 Williamson, E.J., Walker, A.J., Bhaskaran, K., Bacon, S., Bates, C., Morton, C.E., Curtis, H.J.,  
675 Mehrkar, A., Evans, D., Inglesby, P., Cockburn, J., McDonald, H.I., MacKenna, B., Tomlinson,  
676 L., Douglas, I.J., Rentsch, C.T., Mathur, R., Wong, A.Y.S., Grieve, R., Harrison, D., Forbes, H.,  
677 Schultze, A., Croker, R., Parry, J., Hester, F., Harper, S., Perera, R., Evans, S.J.W., Smeeth,  
678 L., Goldacre, B., 2020. Factors associated with COVID-19-related death using OpenSAFELY.  
679 Nature. <https://doi.org/10.1038/s41586-020-2521-4>

680 Wood, S., 2021. mgcv 1.8-34.

681 Zhang, N., Huang, H., Su, B., Ma, X., Li, Y., 2018. A human behavior integrated hierarchical model  
682 of airborne disease transmission in a large city. Build. Environ.  
683 <https://doi.org/10.1016/j.buildenv.2017.11.011>

684

685

686
